# Supplementary material for: Synthesis of 4-styrylcoumarinsviaFeCl3-promoted cascade reactions of propargylamines with β-keto esters
Source: Royal Society of Chemistry journal article supplement (doi:10.1039/c9ob00323a), 2019-01-01

## ***Electronic Supplementary Information***

### **Synthesis of 4-styrylcoumarins *via* FeCl<sub>3</sub>-promoted cascade reactions of propargylamines with $\beta$ -keto esters**

Li-Qin Yan, Xiaoting Cai, Xinwei He,\* Hui Wang, Mengqing Xie, Youpeng Zuo, Yongjia Shang\*

*Key Laboratory of Functional Molecular Solids, Ministry of Education, Anhui Laboratory of Molecule-Based Materials (State Key Laboratory Cultivation Base), College of Chemistry and Materials Science, Anhui Normal University, Wuhu 241000, P.R. China*

\* Corresponging author: [shyj@mail.ahnu.edu.cn](mailto:shyj@mail.ahnu.edu.cn), [xinweihe@mail.ahnu.edu.cn](mailto:xinweihe@mail.ahnu.edu.cn)

### **Table of Contents**

|                                                                                 |        |
|---------------------------------------------------------------------------------|--------|
| X-ray Crystallography Structures of Compounds <b>3ad</b> -----                  | S1     |
| Copies of <sup>1</sup> H and <sup>13</sup> C NMR Spectra for all Compounds----- | S2-S30 |



## X-Ray Crystallography Structures of Compounds **3ad**.

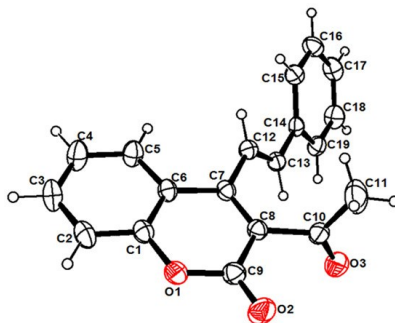

**Figure S1.** X-ray crystal structure of compound **3ad**.

Crystal data for **3ad**:  $C_{19}H_{14}O_3$ ,  $M_r = 290.30$ , Monoclinic,  $a = 8.5355$  (3) Å,  $b = 9.9613$  (3) Å,  $c = 17.9321$  (5) Å,  $\alpha = 90^\circ$ ,  $\beta = 100.199$  (2) $^\circ$ ,  $\gamma = 90^\circ$ ,  $V = 1500.58$  (8) Å<sup>3</sup>,  $T = 273$ (2) K, space group P2(1)/n,  $Z = 4$ , 15425 reflections collected, 3318 unique ( $R_{\text{int}} = 0.0338$ ) which were used in all calculation. The ellipsoid contour probability level in the caption is 30%.

Crystallographic data for compound **3ad** reported in this paper have been deposited with the Cambridge Crystallographic Data Centre as supplementary publication no. **CCDC-1868191**.



O=C1C(=O)c2ccccc2C(=O)C1=Cc3ccccc3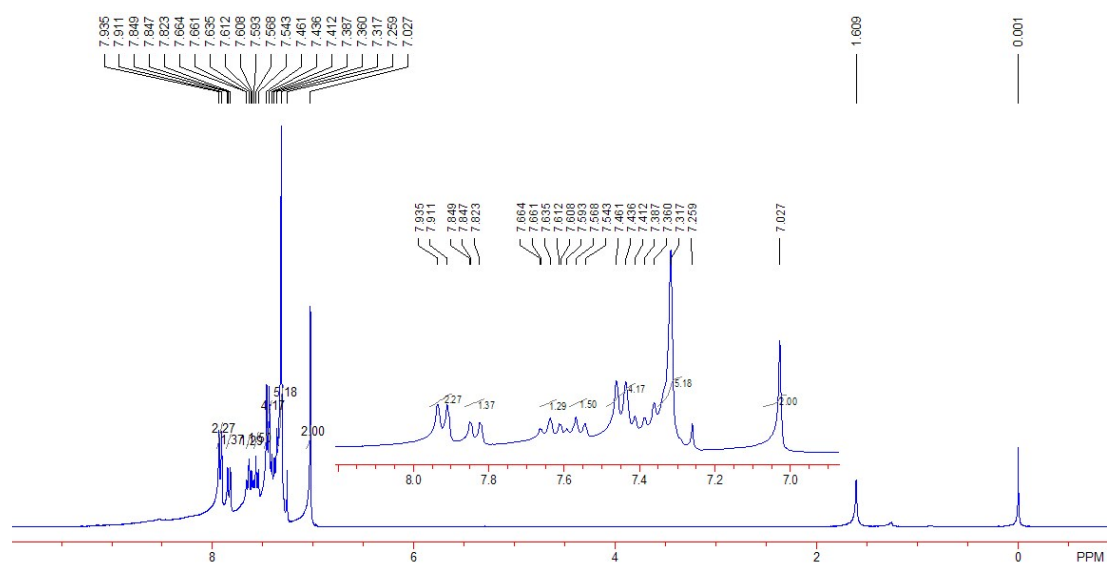
O=C1C(=O)c2ccccc2C(=C1)C(=C3C=CC(=C3)c4ccccc4)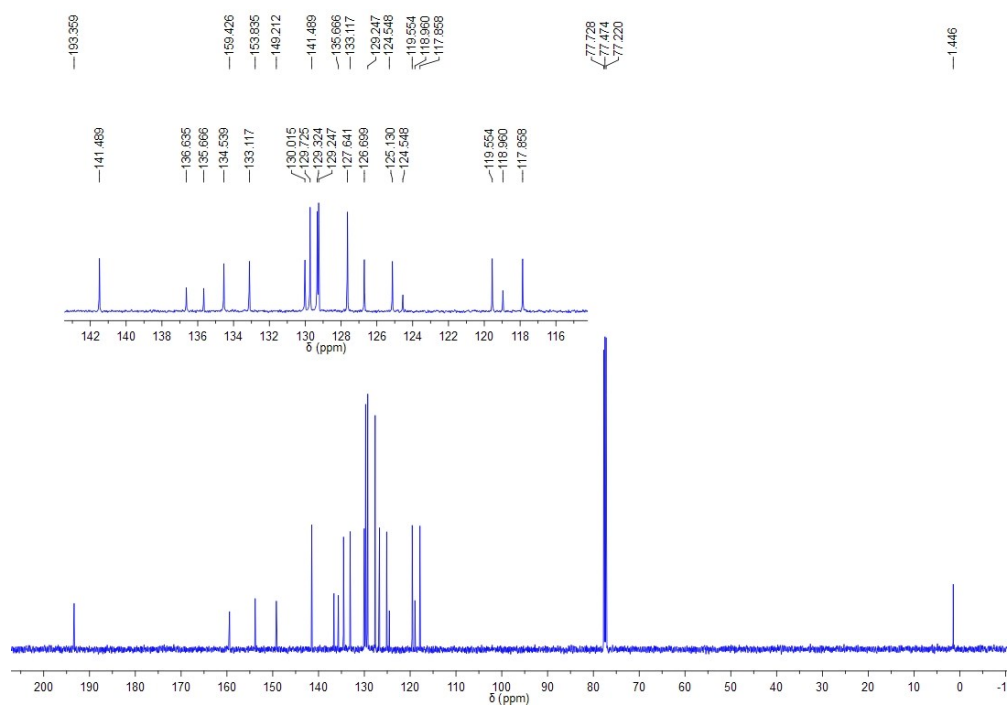



# <sup>1</sup>H NMR and <sup>13</sup>C NMR Spectra of Compound 3ab

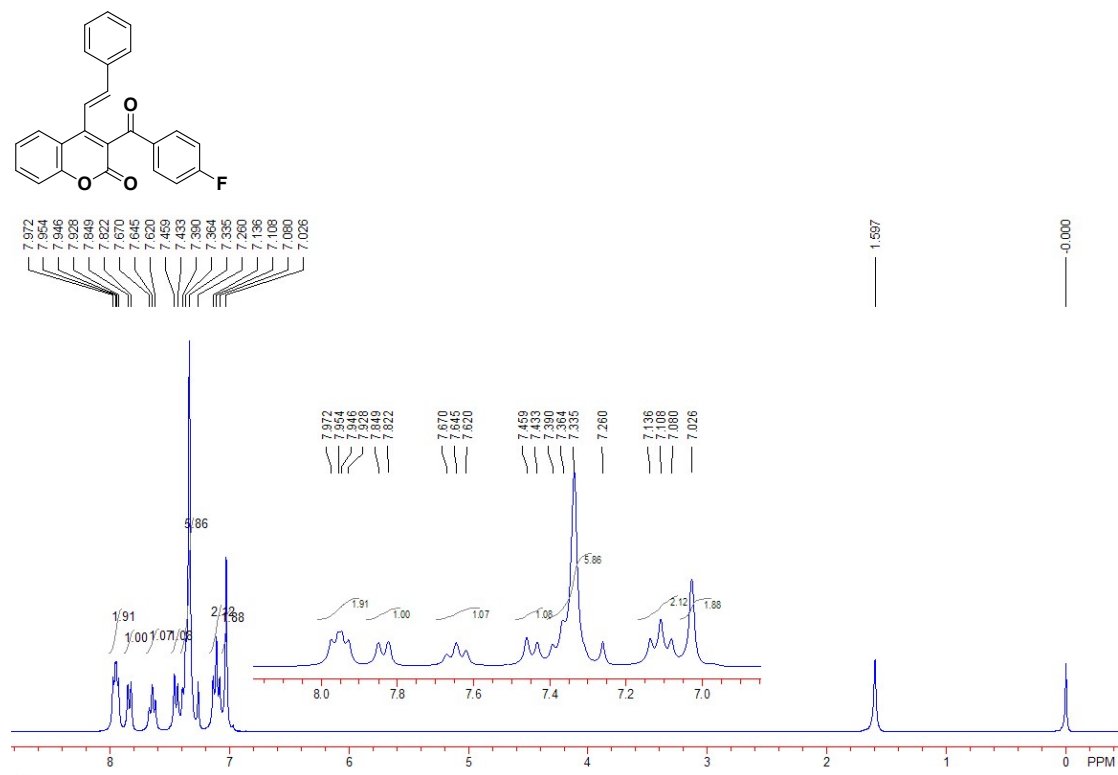

## <sup>13</sup>C NMR Spectra of Compound 3ab

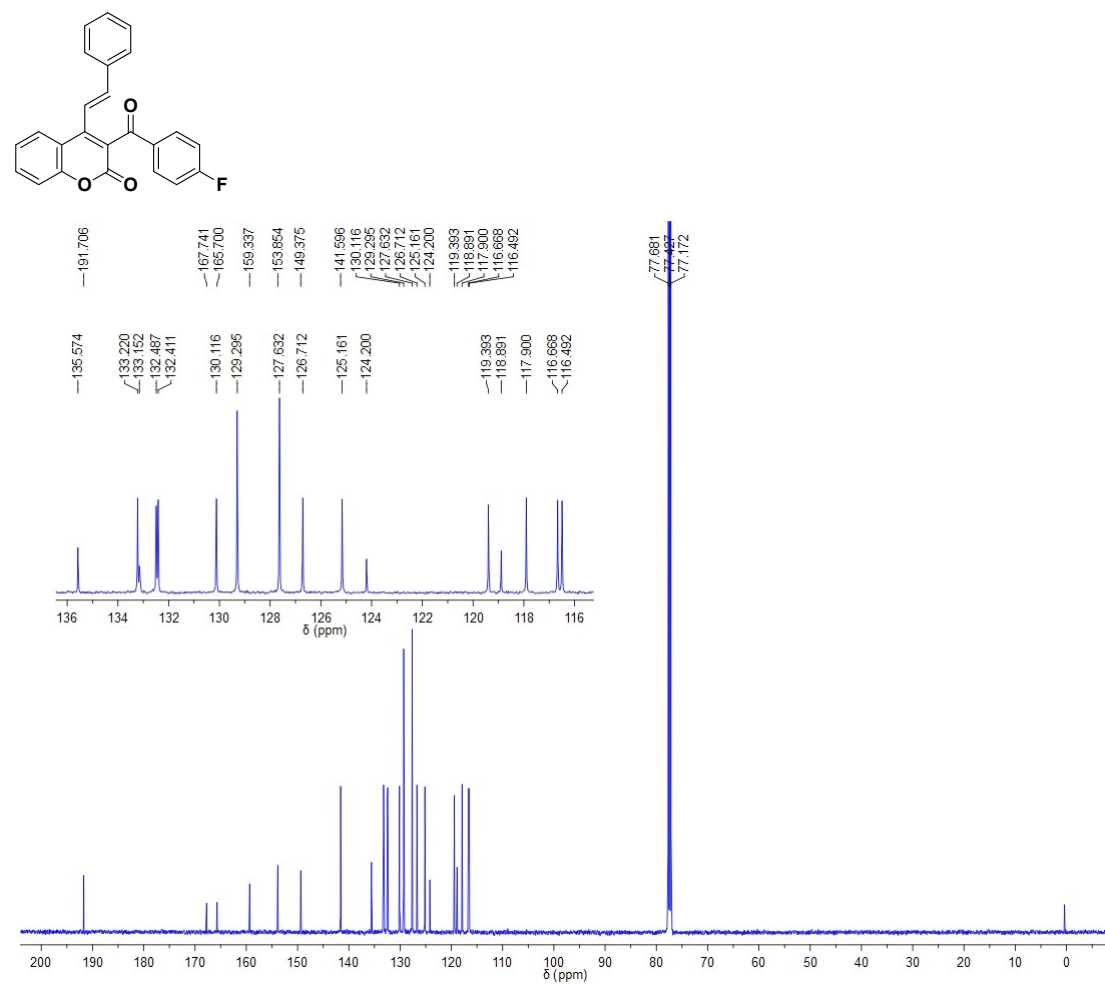



## <sup>1</sup>H NMR Spectra of Compound 3ac

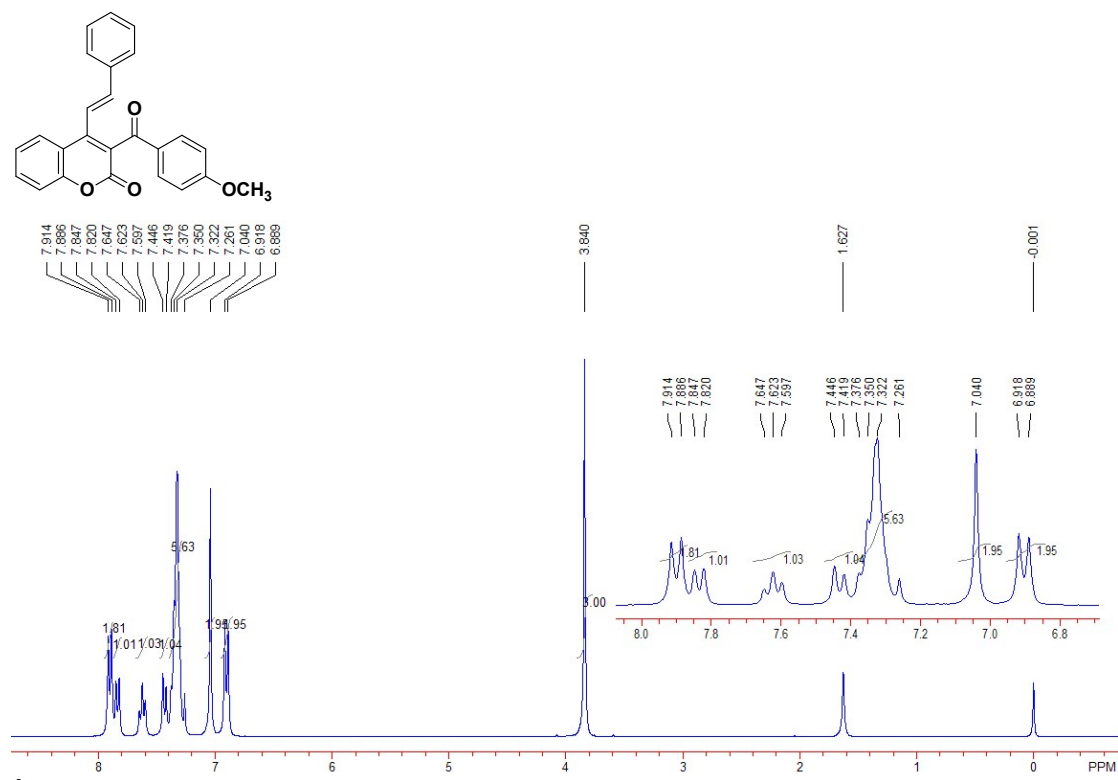

## <sup>13</sup>C NMR Spectra of Compound 3ac

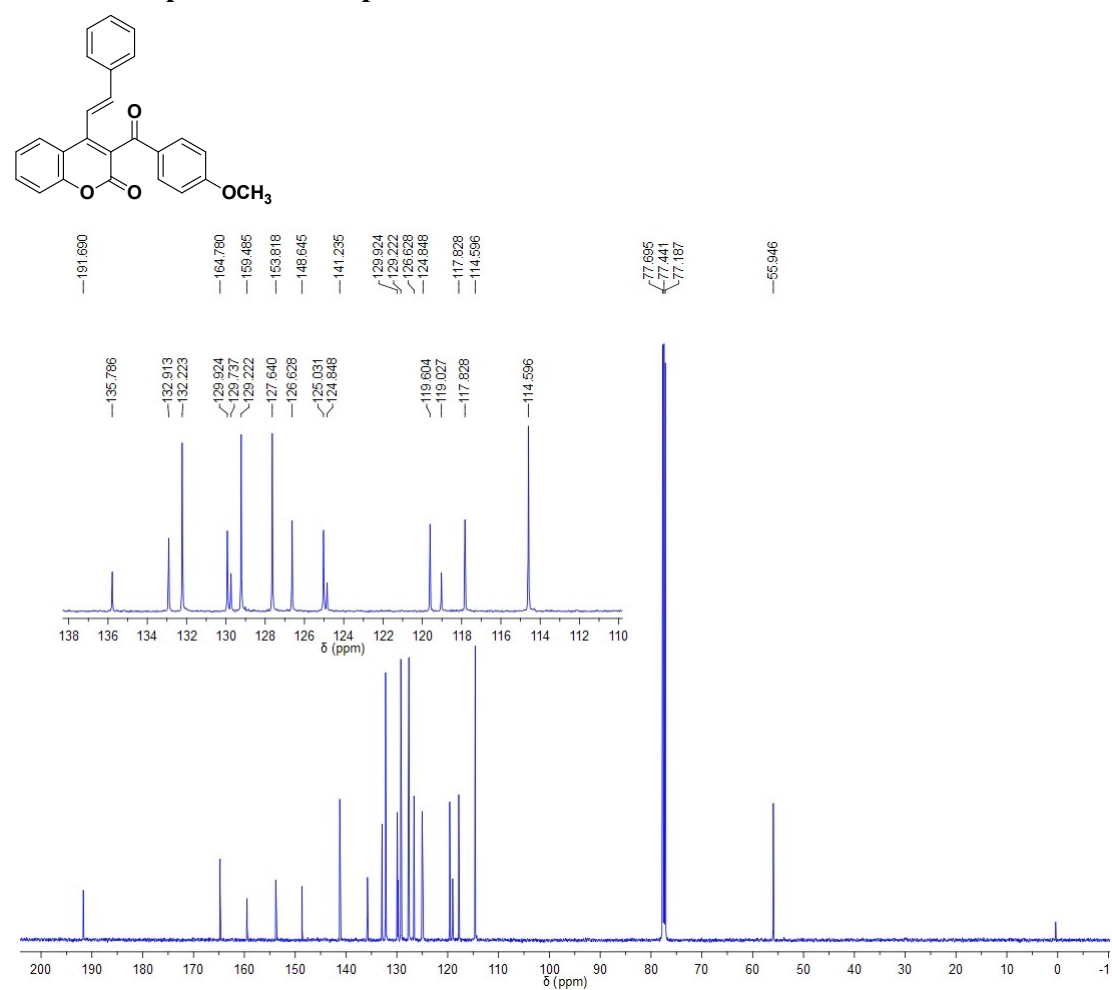



## <sup>1</sup>H NMR Spectra of Compound 3ad

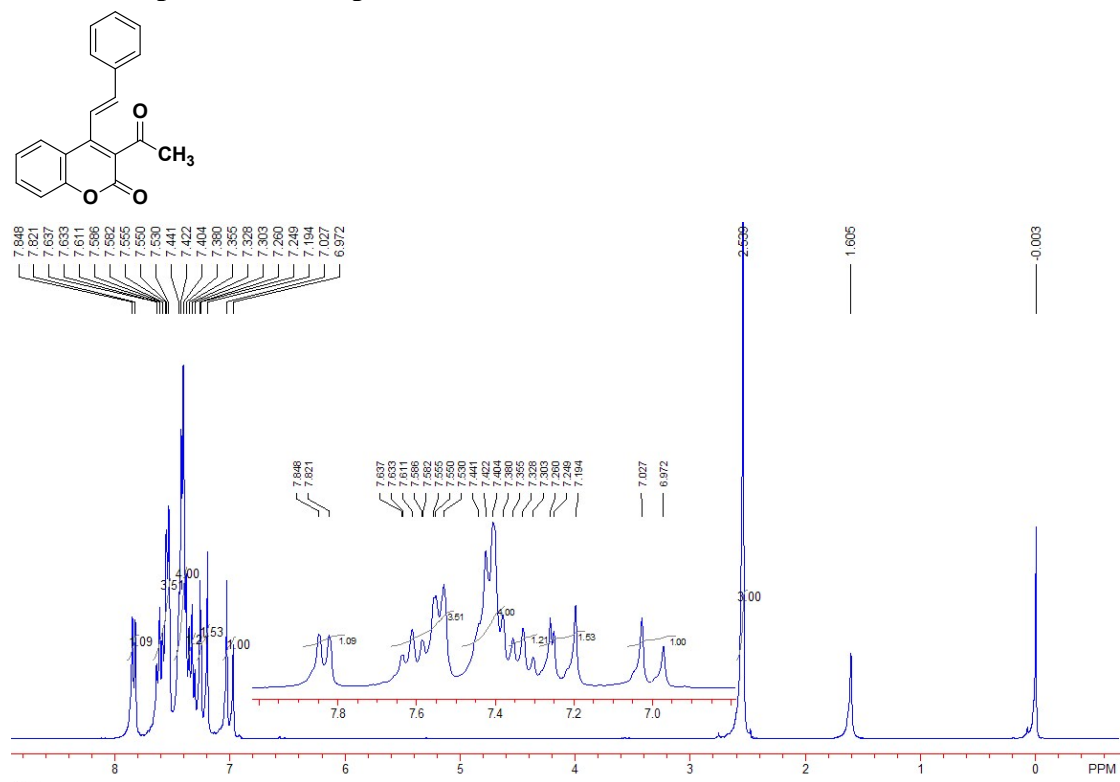

## <sup>13</sup>C NMR Spectra of Compound 3ad

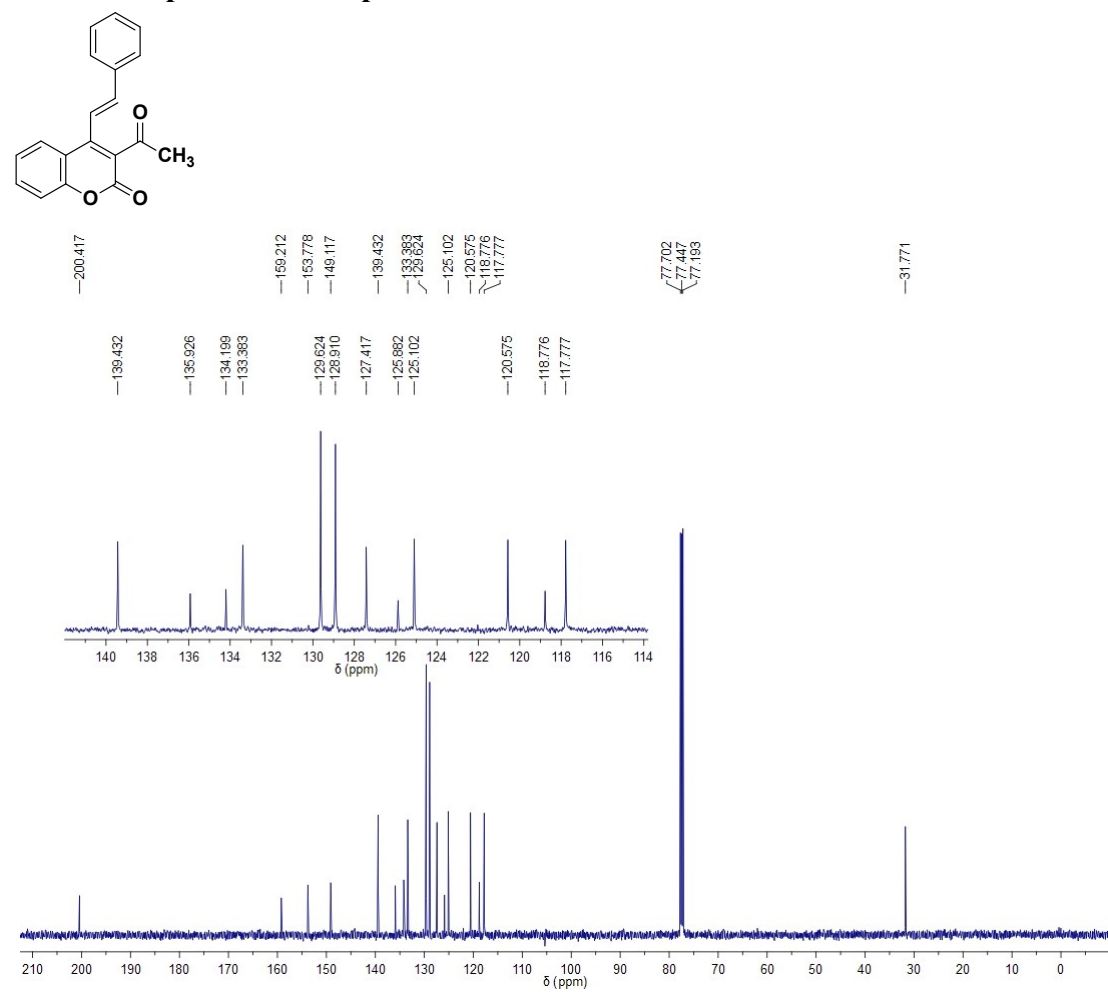



O=C1C(=O)c2ccccc2Oc3cc(Cl)ccc3C=Cc4ccccc4

Chemical structure of the compound: 2-chloro-3-oxo-3-phenyl-5-phenyl-2,3-dihydro-1H-benzofuran-4-ylidene-1-phenyl-1H-imidazole.

<sup>1</sup>H NMR spectrum (CDCl<sub>3</sub>) showing peaks in the aromatic region (6.8-8.0 ppm) and a reference peak at 0.001 ppm. Integration values are provided for several peak groups.

Peak list (ppm): 7.916, 7.891, 7.778, 7.771, 7.598, 7.590, 7.589, 7.580, 7.556, 7.468, 7.442, 7.416, 7.403, 7.373, 7.327, 7.261, 7.054, 7.000, 6.978, 6.924.

Integration values: 2.02, 1.00, 2.41, 1.01, 2.35, 2.02, 1.00, 2.21, 1.96, 1.11, 5.84, 2.35.

O=C1C(=O)c2ccccc2Oc3cc(Cl)ccc3C=Cc4ccccc4

Chemical structure of 2-chloro-3-phenyl-4-oxo-4-phenyl-2,3-dihydro-1H-benzofuran-5-carboxylic acid is shown above the spectrum.

<sup>13</sup>C NMR peaks (ppm):

- 192.832
- 158.827
- 152.200
- 148.046
- 142.025
- 134.672
- 130.225
- 129.287
- 125.443
- 120.190
- 119.256
- 118.819
- 136.409
- 135.432
- 134.672
- 132.974
- 130.601
- 130.225
- 129.686
- 129.368
- 127.717
- 126.095
- 125.443
- 120.190
- 119.256
- 118.819
- 77.680
- 77.435
- 77.181
- 0



# <sup>1</sup>H NMR Spectra of Compound 3bc

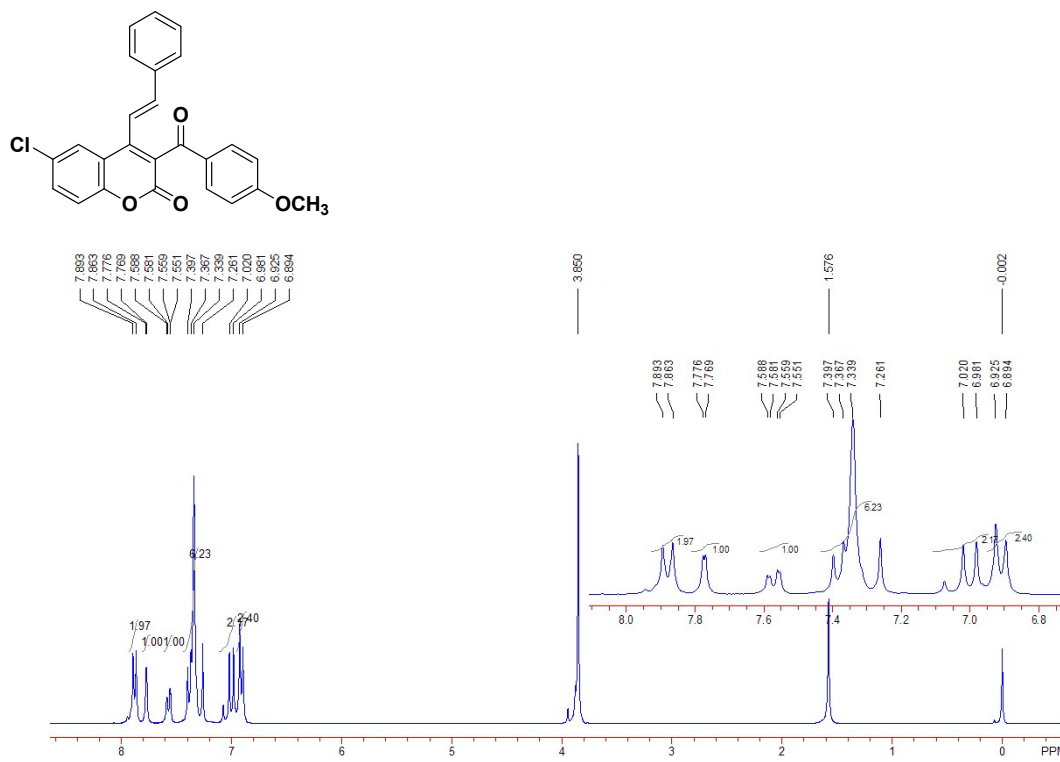

# <sup>13</sup>C NMR Spectra of Compound 3bc

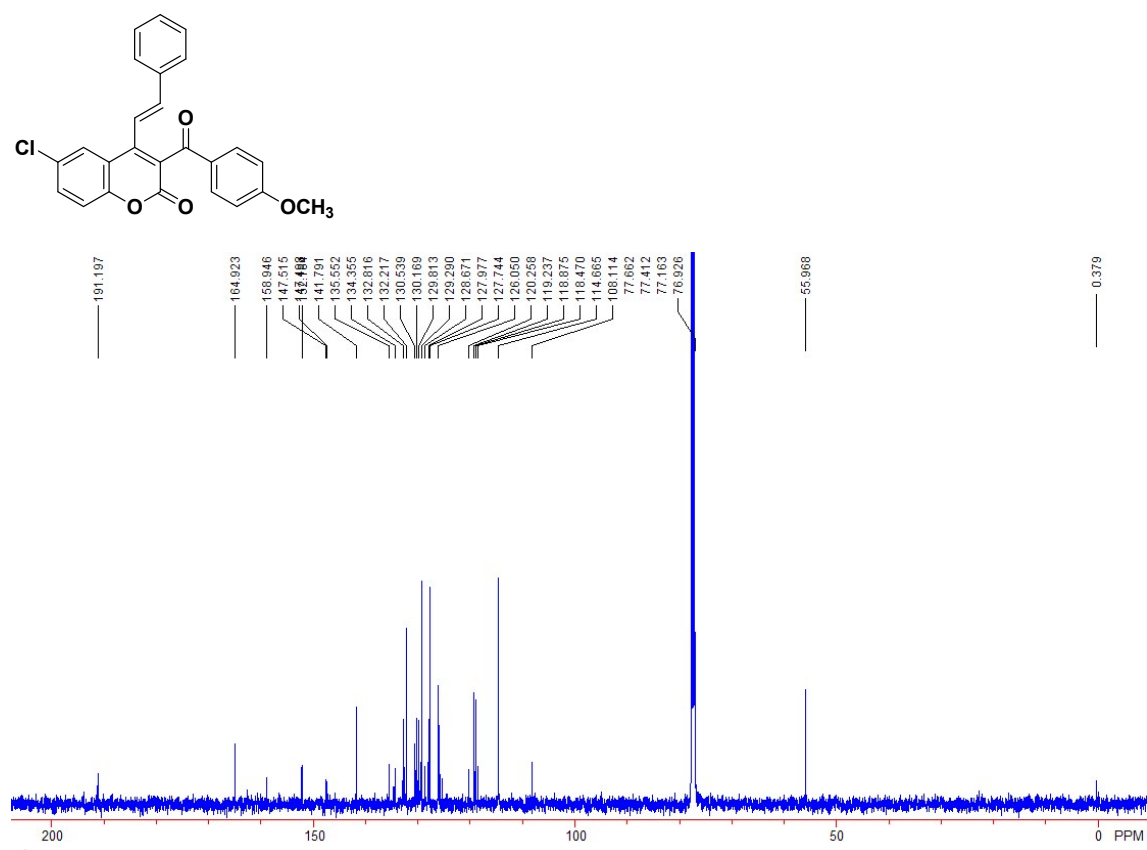



# **<sup>1</sup>H NMR Spectra of Compound 3bd**

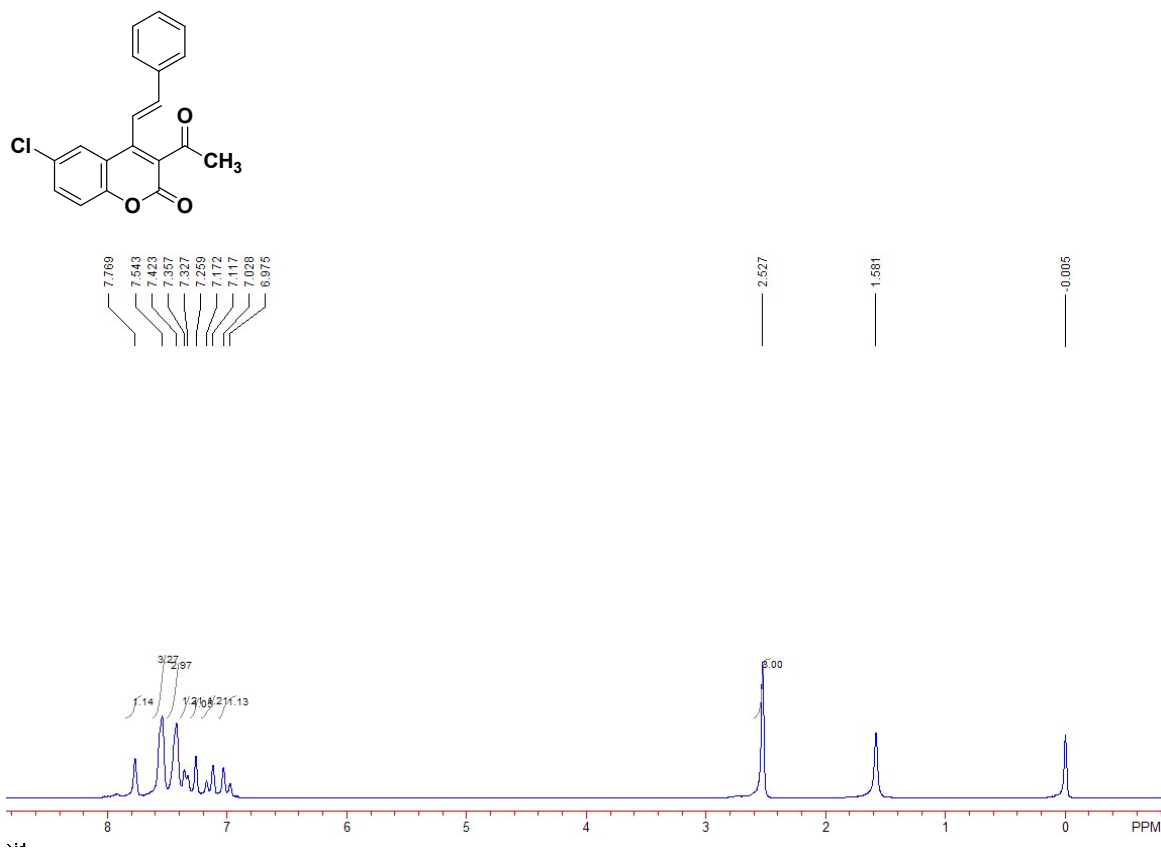

# **<sup>13</sup>C NMR Spectra of Compound 3bd**

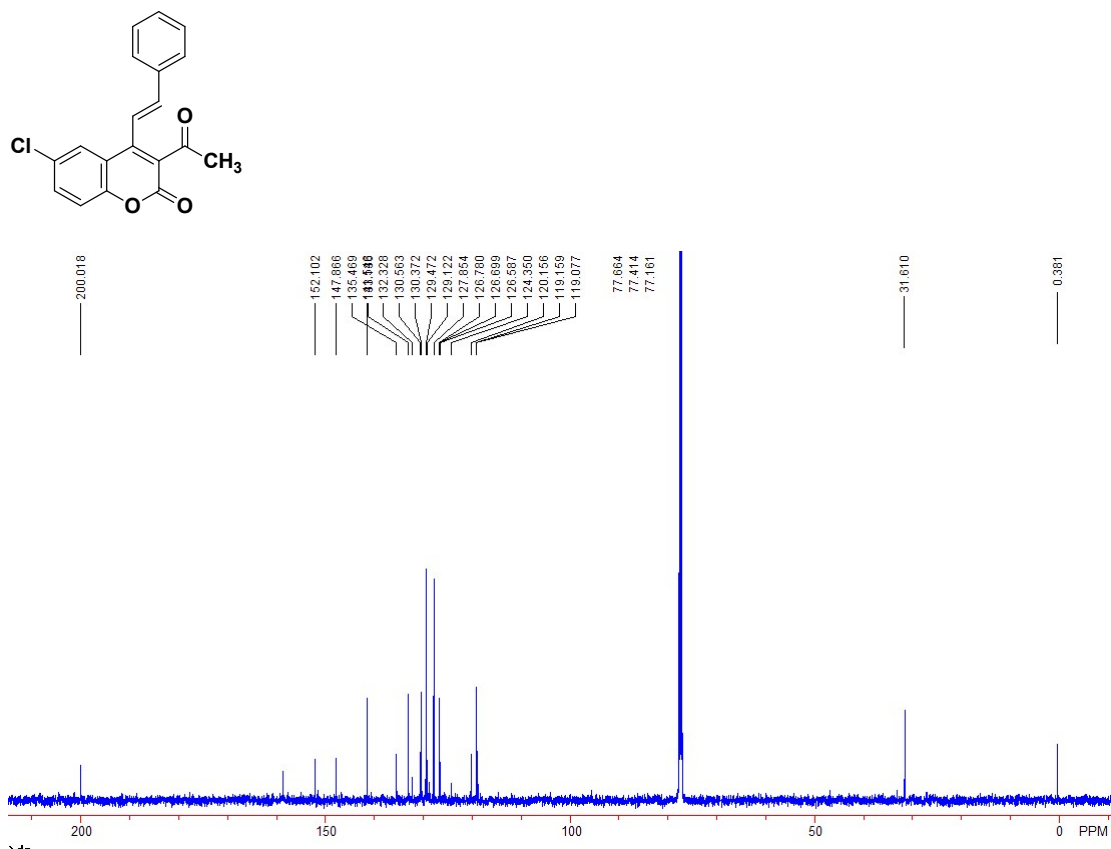



## <sup>1</sup>H NMR Spectra of Compound 3ca

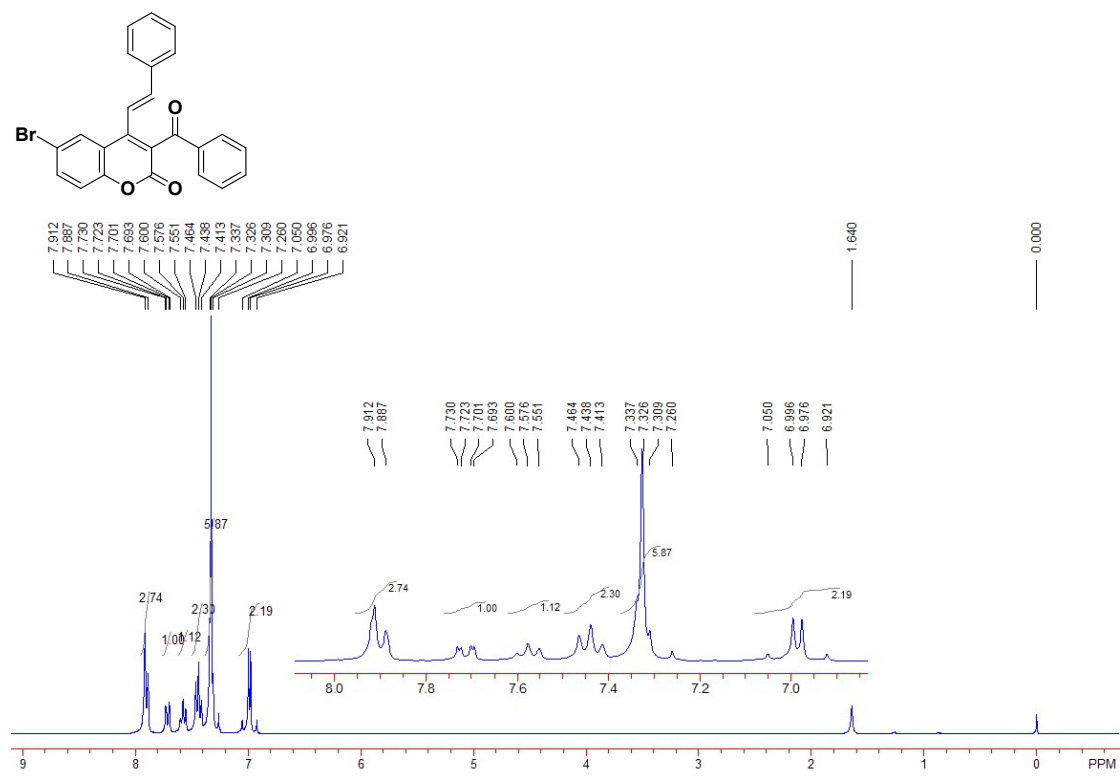

## <sup>13</sup>C NMR Spectra of Compound 3ca

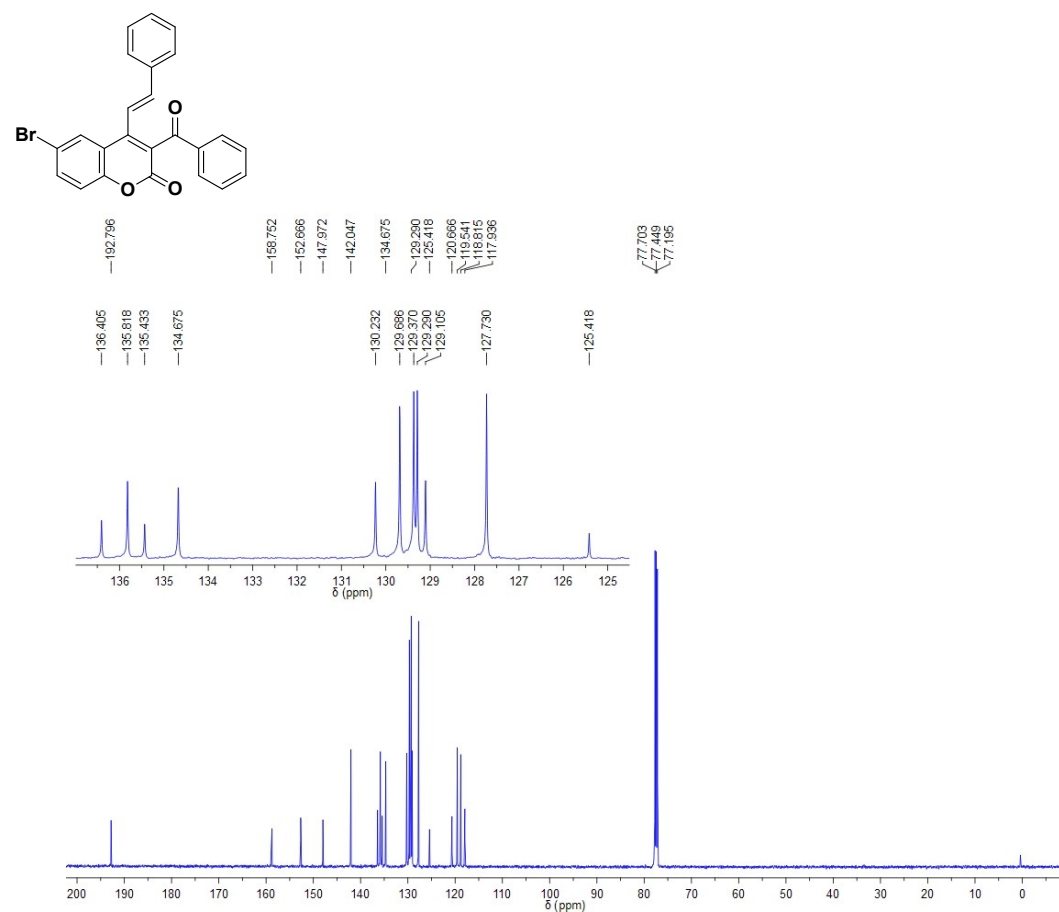



# **<sup>1</sup>H NMR Spectra of Compound 3cb**

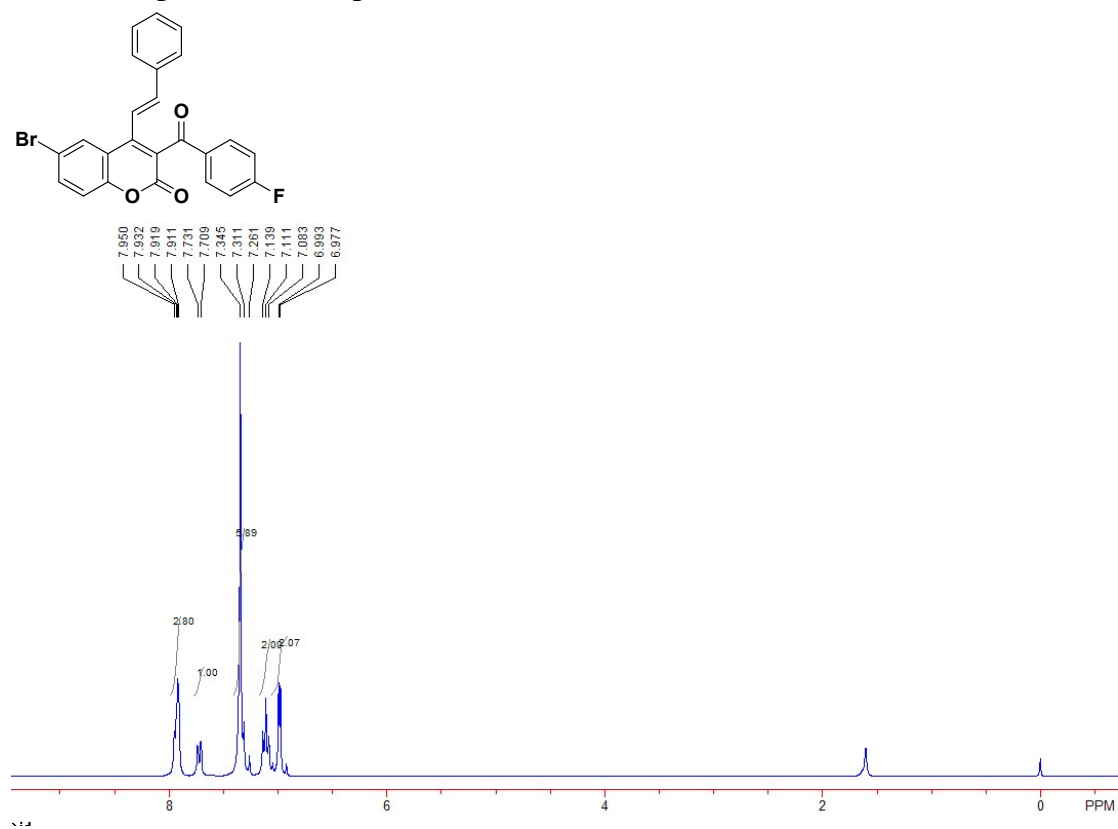

# **<sup>13</sup>C NMR Spectra of Compound 3cb**

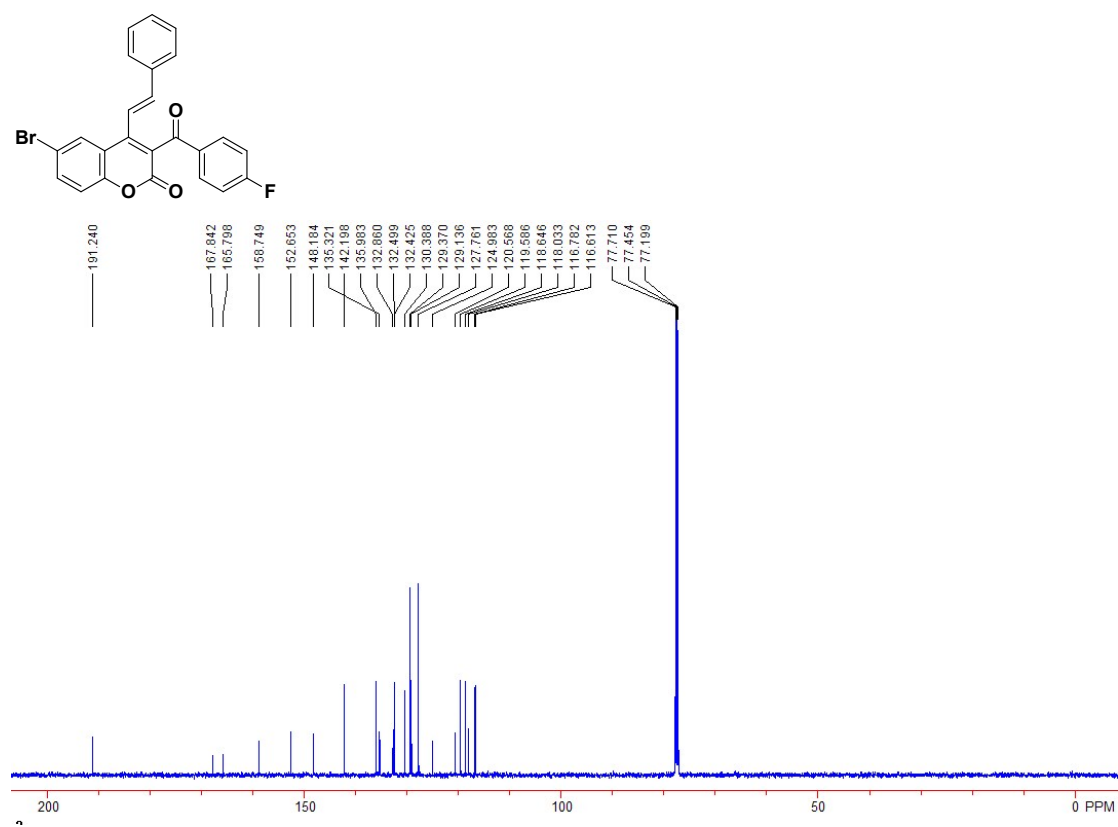



# **<sup>1</sup>H NMR Spectra of Compound 3cc**

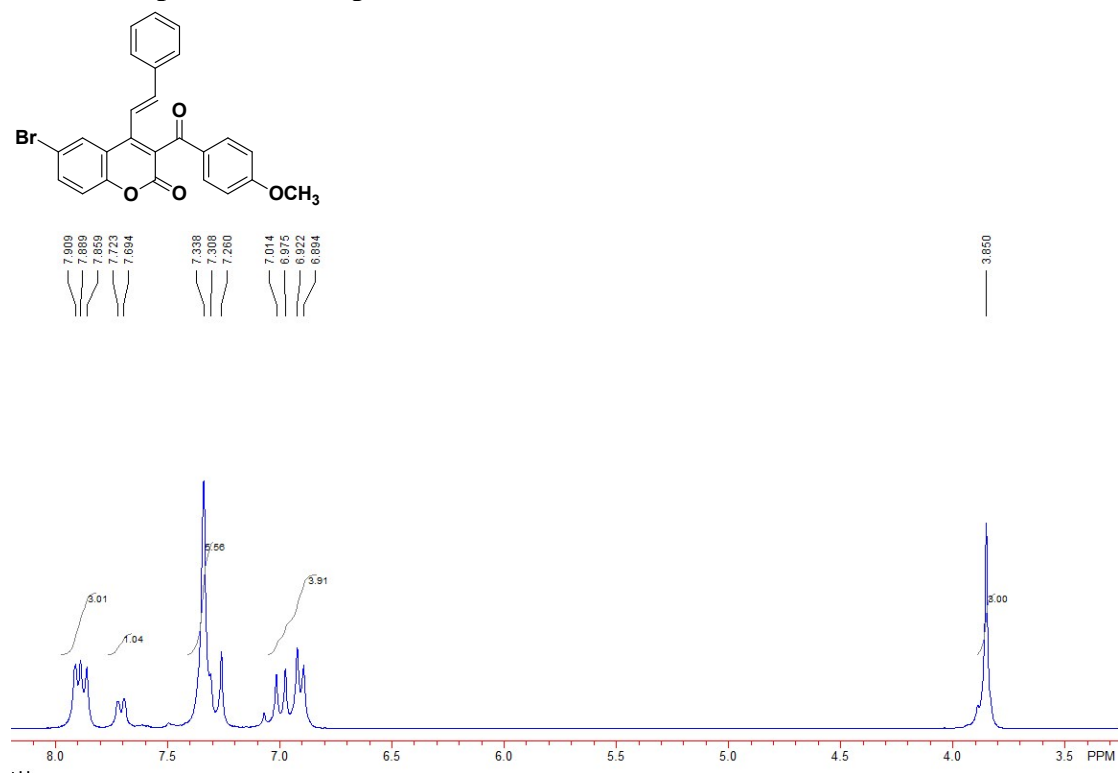

# **<sup>13</sup>C NMR Spectra of Compound 3cc**

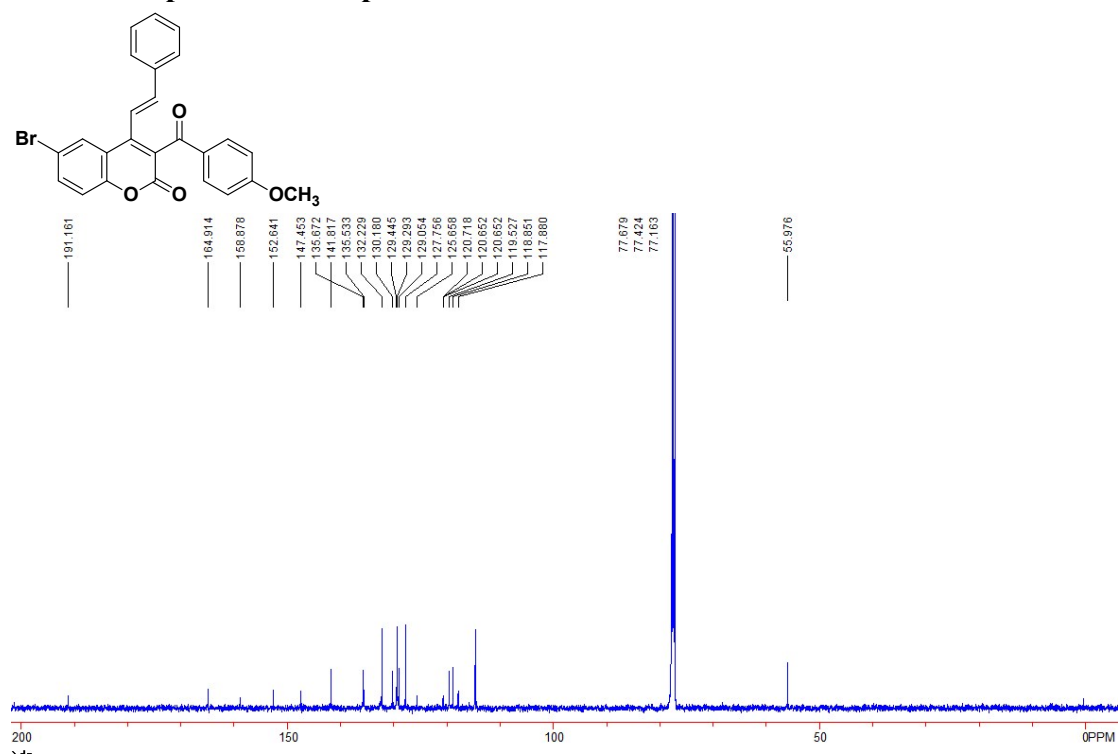



CC(=O)C(=Cc1ccc(Br)cc1OC(=O)c2ccccc2)C(=O)c3ccccc3

**Chemical Structure:** 2-bromo-4-(benzylidene)-6-oxo-1,2,3,4-tetrahydronaphthalen-1-ylidene-benzene

**<sup>1</sup>H NMR Data (CDCl<sub>3</sub>):**

| Chemical Shift (ppm)                                                                                                         | Integration                              |
|------------------------------------------------------------------------------------------------------------------------------|------------------------------------------|
| 7.911, 7.904, 7.708, 7.679, 7.671, 7.565, 7.535, 7.441, 7.420, 7.417, 7.293, 7.284, 7.261, 7.252, 7.166, 7.111, 7.101, 6.972 | 1.00, 0.96, 2.33, 3.08, 1.49, 1.09, 0.99 |
| 2.523                                                                                                                        | 2.96                                     |

Chemical structure of compound 10: CC(=O)C(=Cc1ccccc1)c2cc(Br)ccc2O

<sup>13</sup>C NMR spectrum (top): CDCl<sub>3</sub>. Peaks (ppm): 200.006, 152.549, 147.765, 141.578, 138.603, 152.549, 147.765, 141.578, 136.450, 135.972, 135.450, 130.362, 129.473, 128.689, 126.751, 120.614, 127.865, 119.438, 117.885, 126.751, 120.614, 119.040, 117.895.

<sup>13</sup>C NMR spectrum (bottom): DMSO-d<sub>6</sub>. Peaks (ppm): 200.006, 152.549, 147.765, 141.578, 138.603, 152.549, 147.765, 141.578, 136.450, 135.972, 135.450, 130.362, 129.473, 128.689, 126.751, 120.614, 127.865, 119.438, 117.885, 126.751, 120.614, 119.040, 117.895, 31.636.



Chemical structure of 2-methyl-6-phenyl-2H-chromene-3-carboxylic acid is shown above the spectrum. The structure includes a chromene core with a methyl group at position 2, a phenyl group at position 6, and a carboxylic acid group at position 3. Protons are labeled with numbers corresponding to the integration values.

<sup>1</sup>H NMR spectrum (CDCl<sub>3</sub>) showing peaks in the aromatic region (6.5-8.0 ppm) and aliphatic region (1.5-2.5 ppm). The spectrum is integrated, showing values such as 1.80, 2.15, 3.05, 1.94, 3.00, 1.579, and 0.001.

Chemical structure of 6-methyl-2-phenyl-2H-chromene-3-carbonyl is shown above the  $^{13}\text{C}$  NMR spectrum. The spectrum displays two regions of peaks, with chemical shifts (ppm) labeled above the peaks.

Top region peaks (ppm): 136.748, 135.763, 134.876, 134.434, 134.113, 133, 132, 131, 129.934, 129.700, 129.228, 129.276, 129.228, 127.624, 126.368, 124.509, 124.450.

Bottom region peaks (ppm): 200, 190, 180, 170, 160, 150, 140, 130, 120, 110, 100, 90, 80, 70, 60, 50, 40, 30, 20, 10, 0.



# <sup>1</sup>H NMR Spectra of Compound 3db

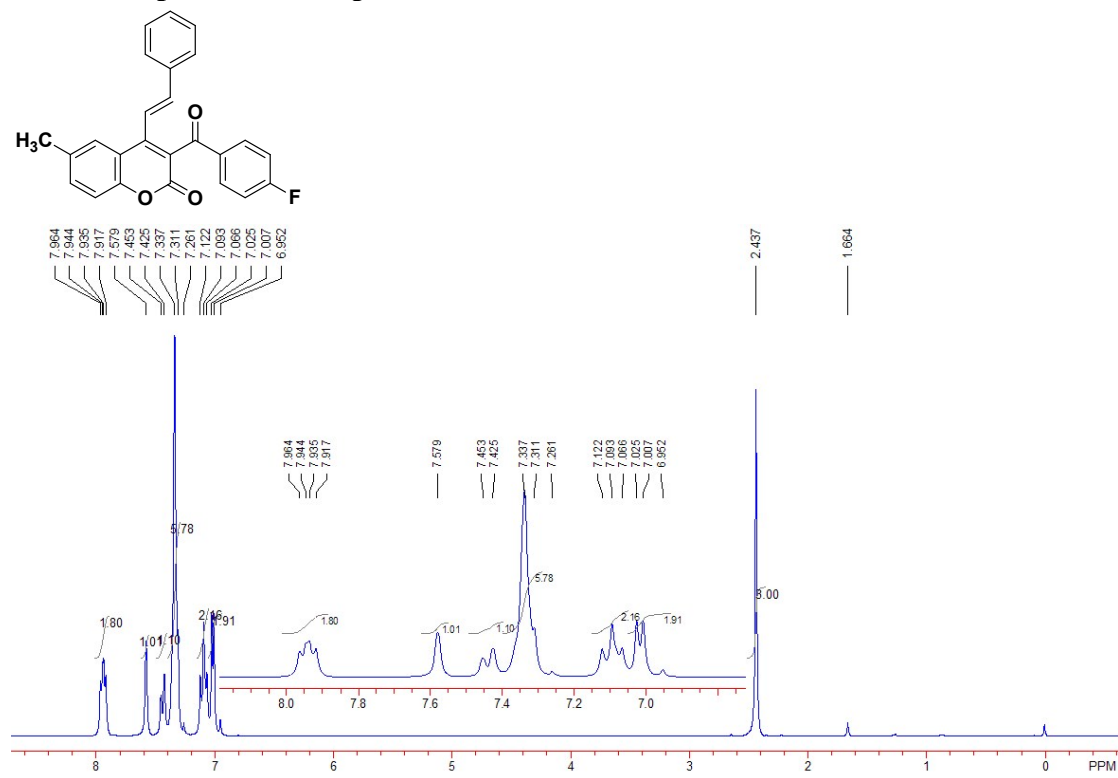

# <sup>13</sup>C NMR Spectra of Compound 3db

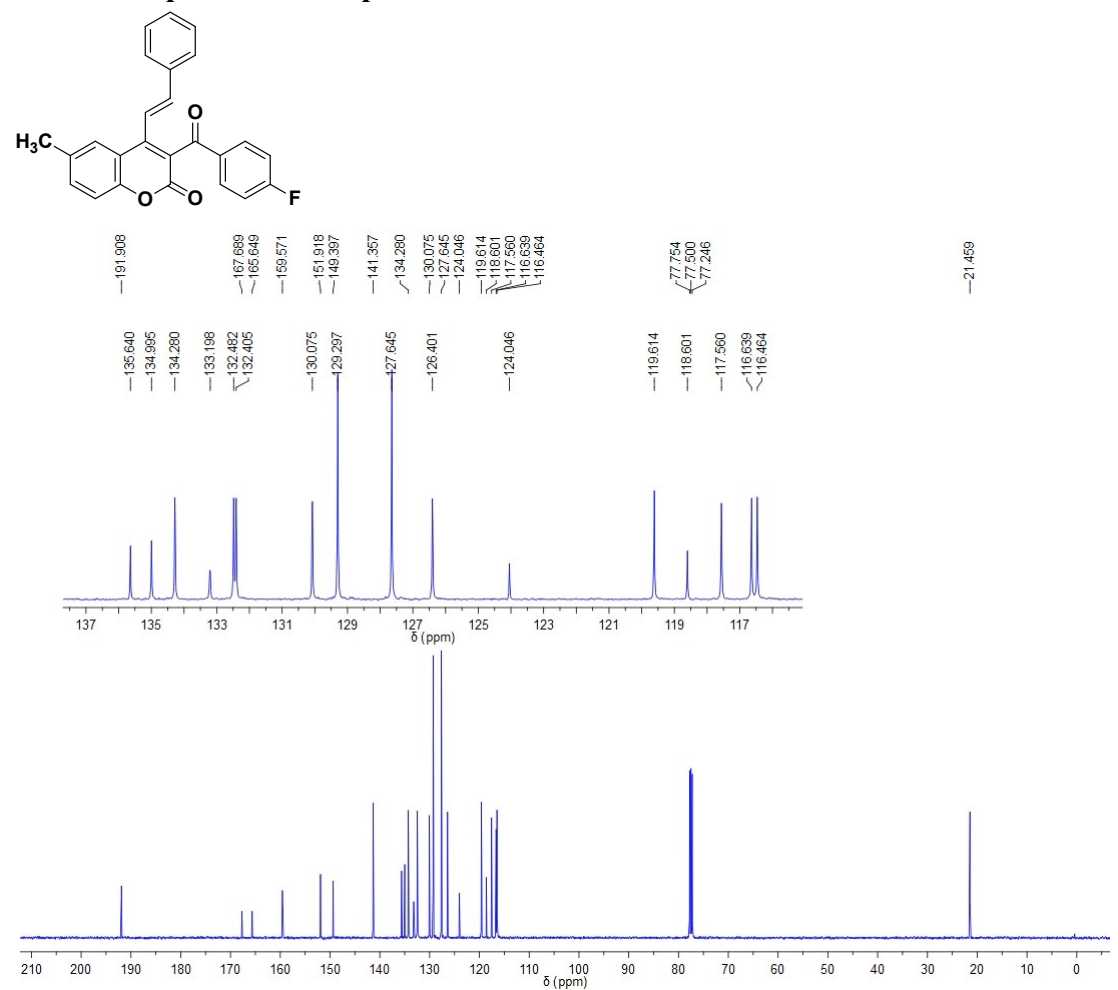



# <sup>1</sup>H NMR Spectra of Compound 3dc

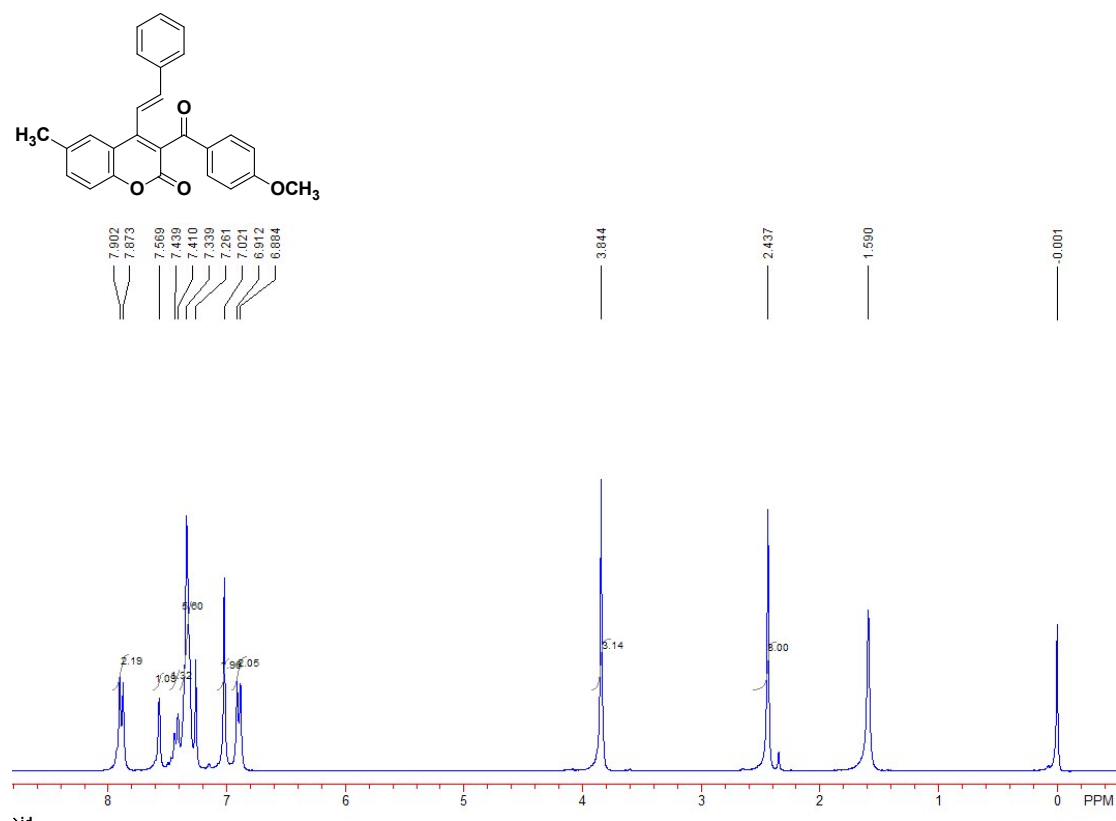

# <sup>13</sup>C NMR Spectra of Compound 3dc

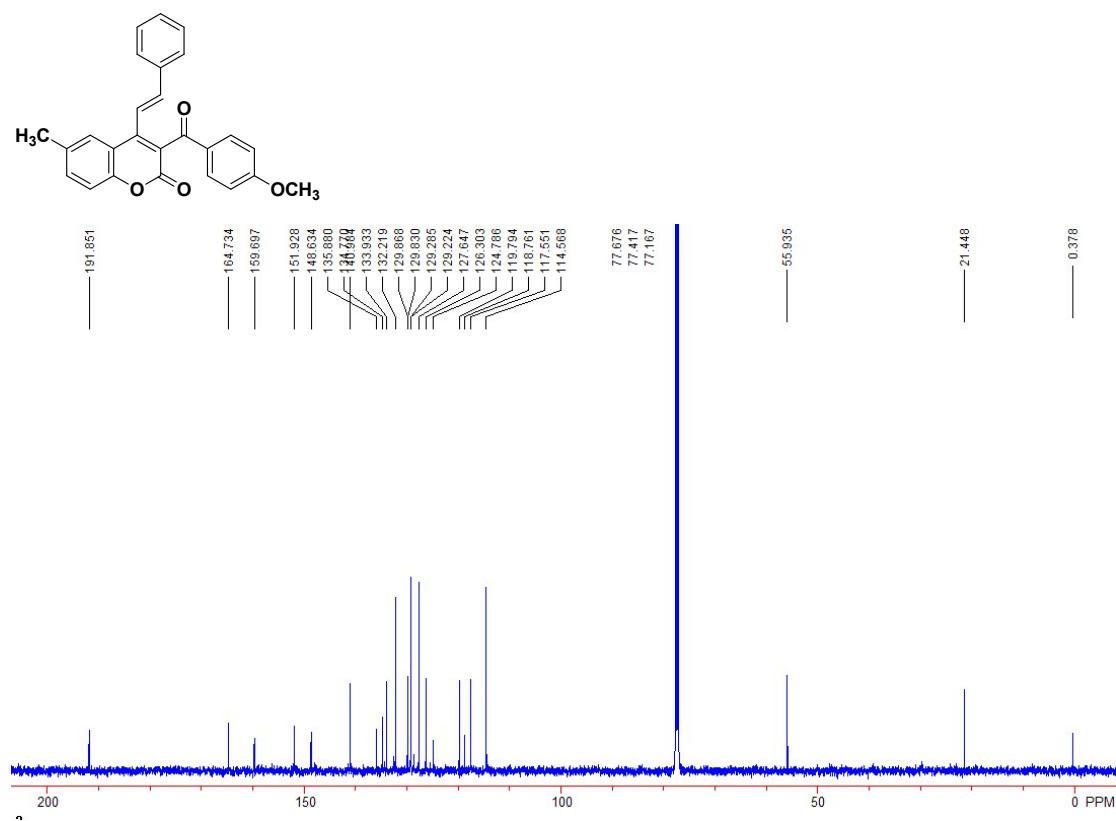



# **<sup>1</sup>H NMR Spectra of Compound 3dd**

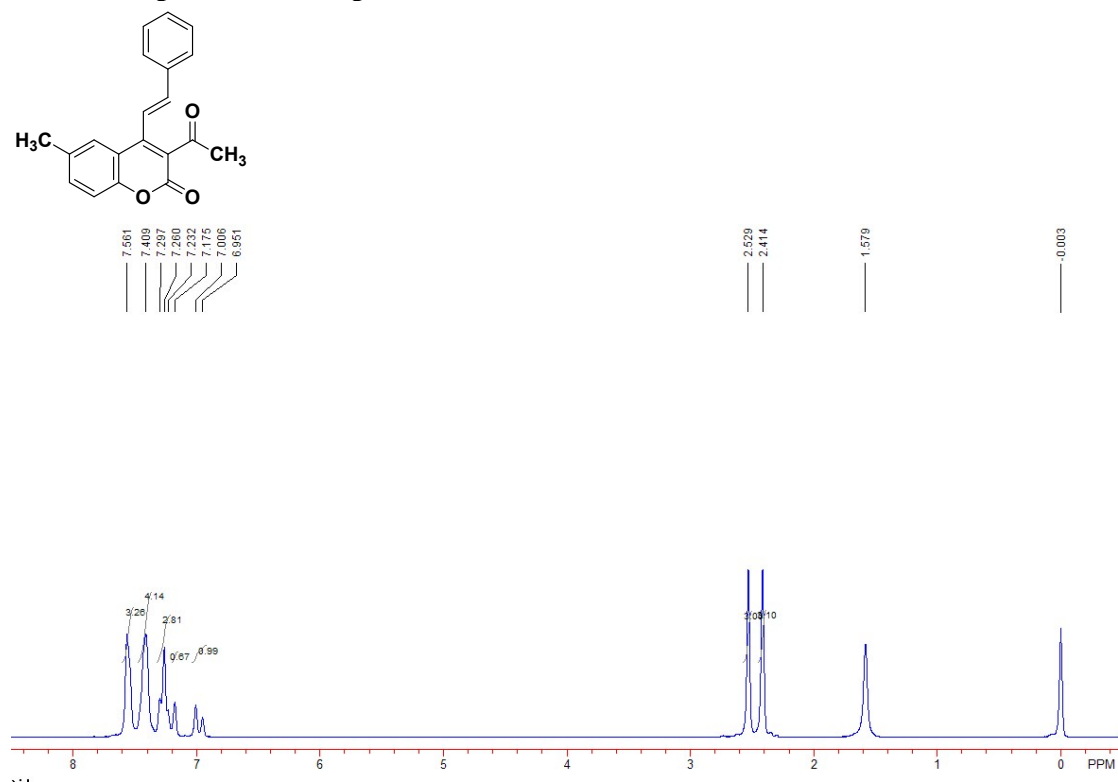

# **<sup>13</sup>C NMR Spectra of Compound 3dd**

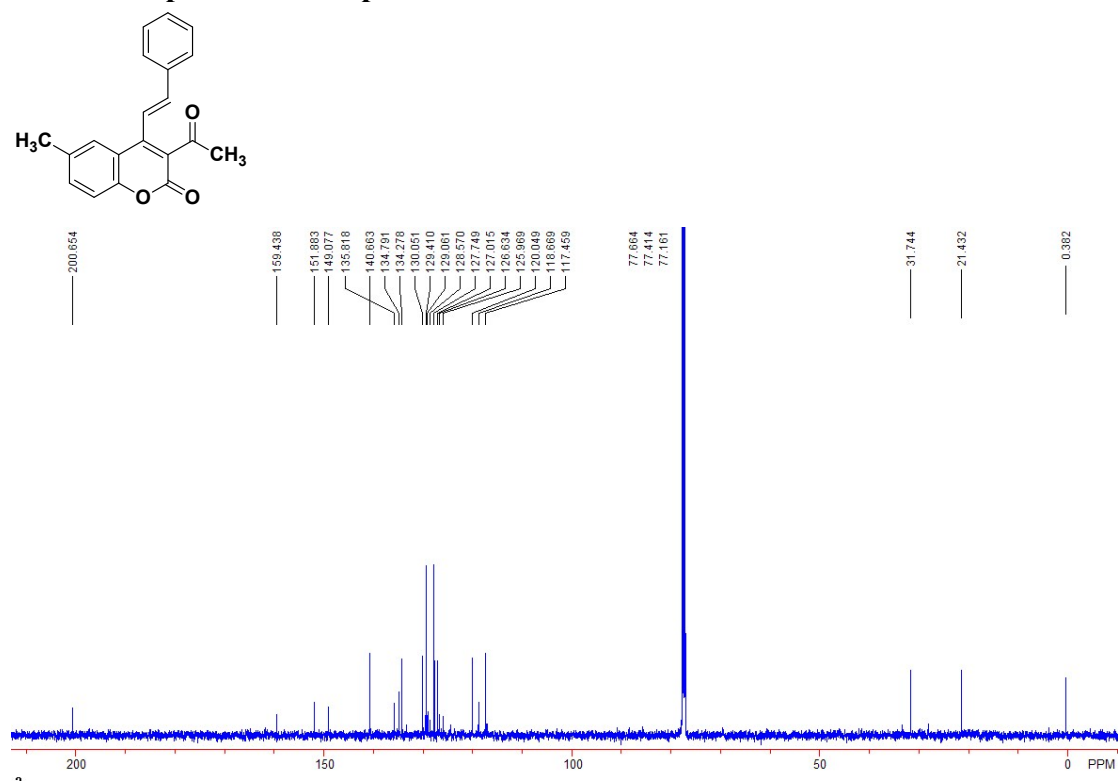



# <sup>1</sup>H NMR Spectra of Compound 3ea

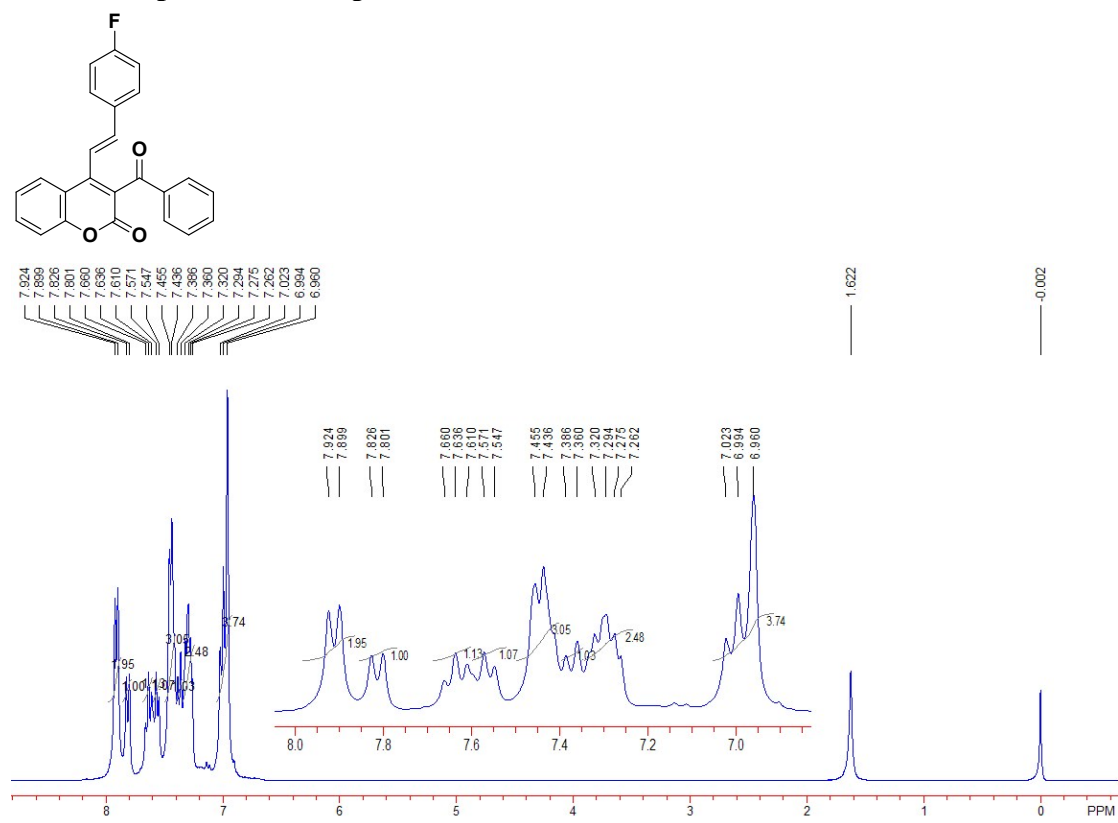

# <sup>13</sup>C NMR Spectra of Compound 3ea

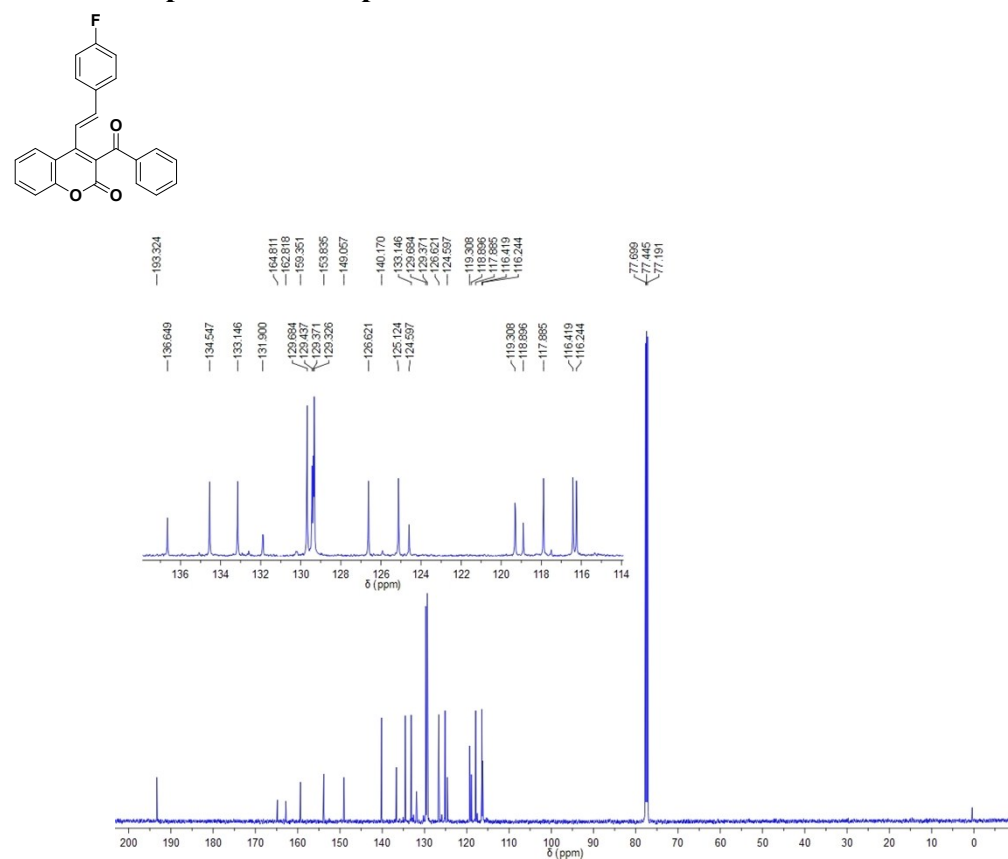



## <sup>1</sup>H NMR Spectra of Compound 3eb

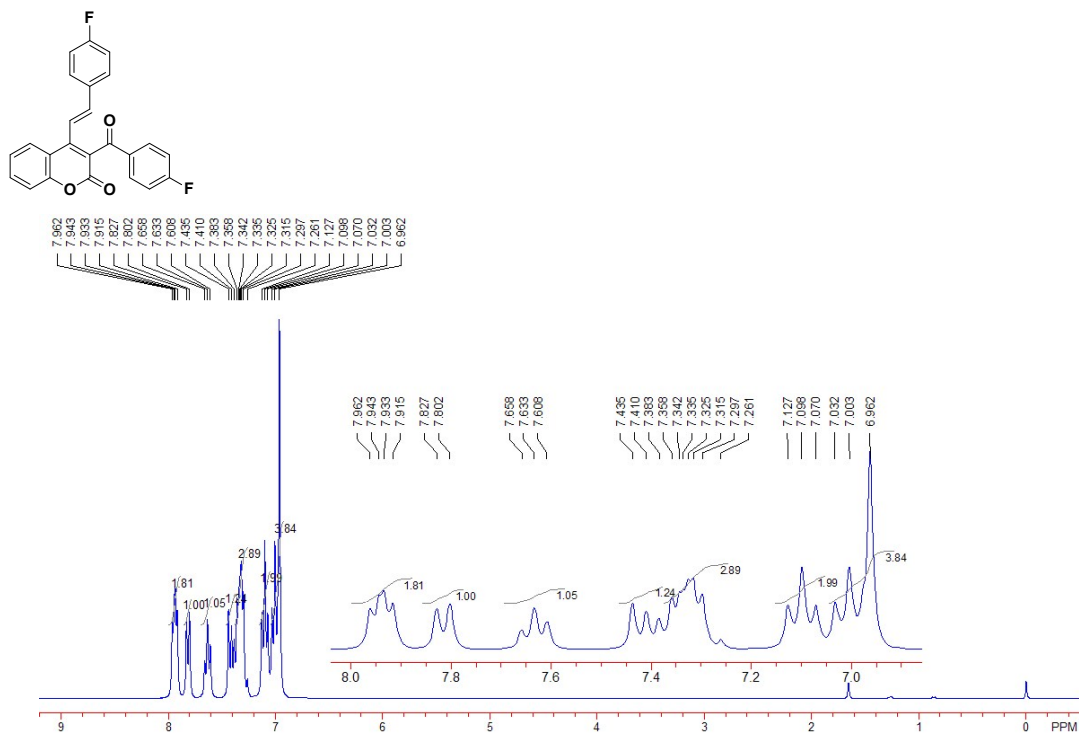

## <sup>13</sup>C NMR Spectra of Compound 3eb

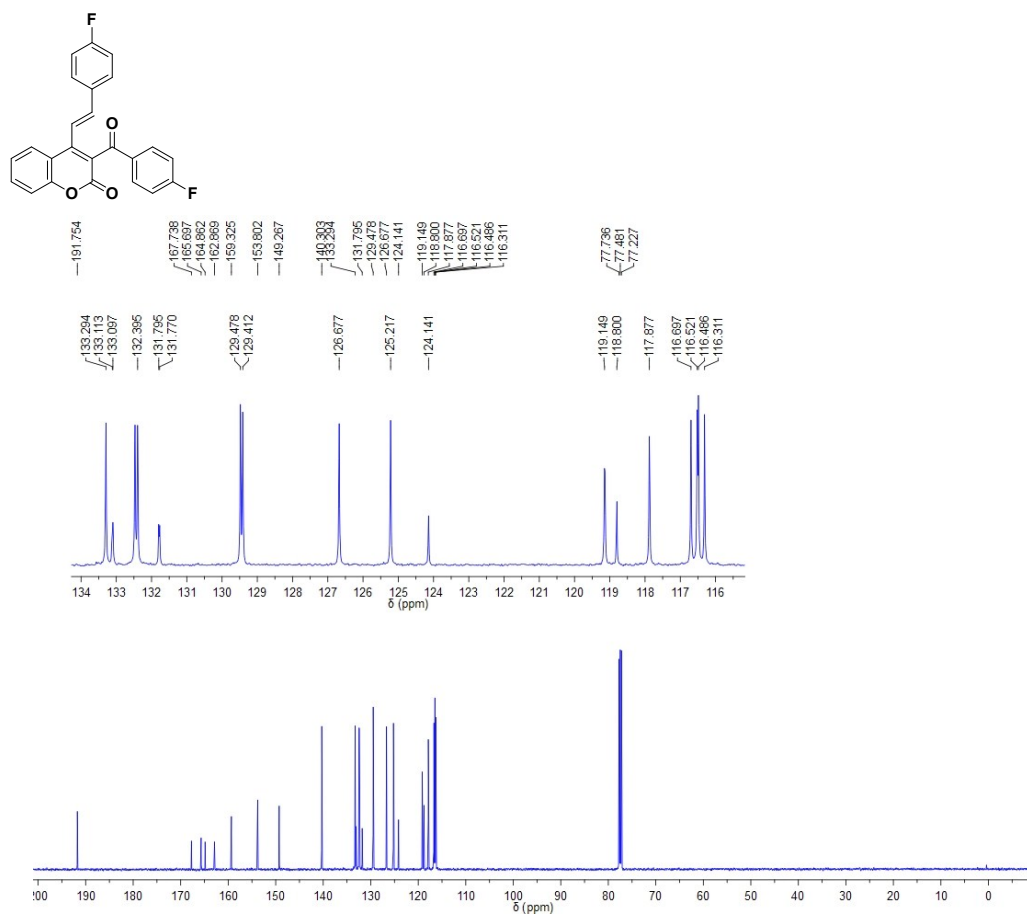



## <sup>1</sup>H NMR Spectra of Compound 3ec

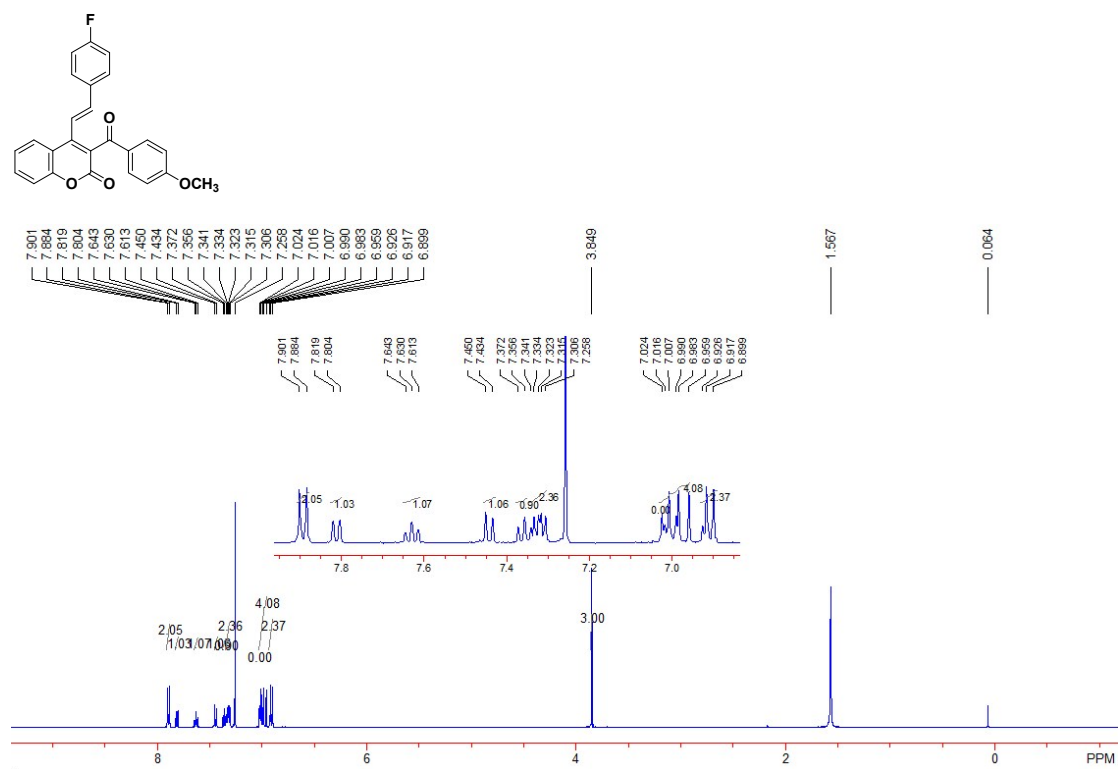

## <sup>13</sup>C NMR Spectra of Compound 3ec

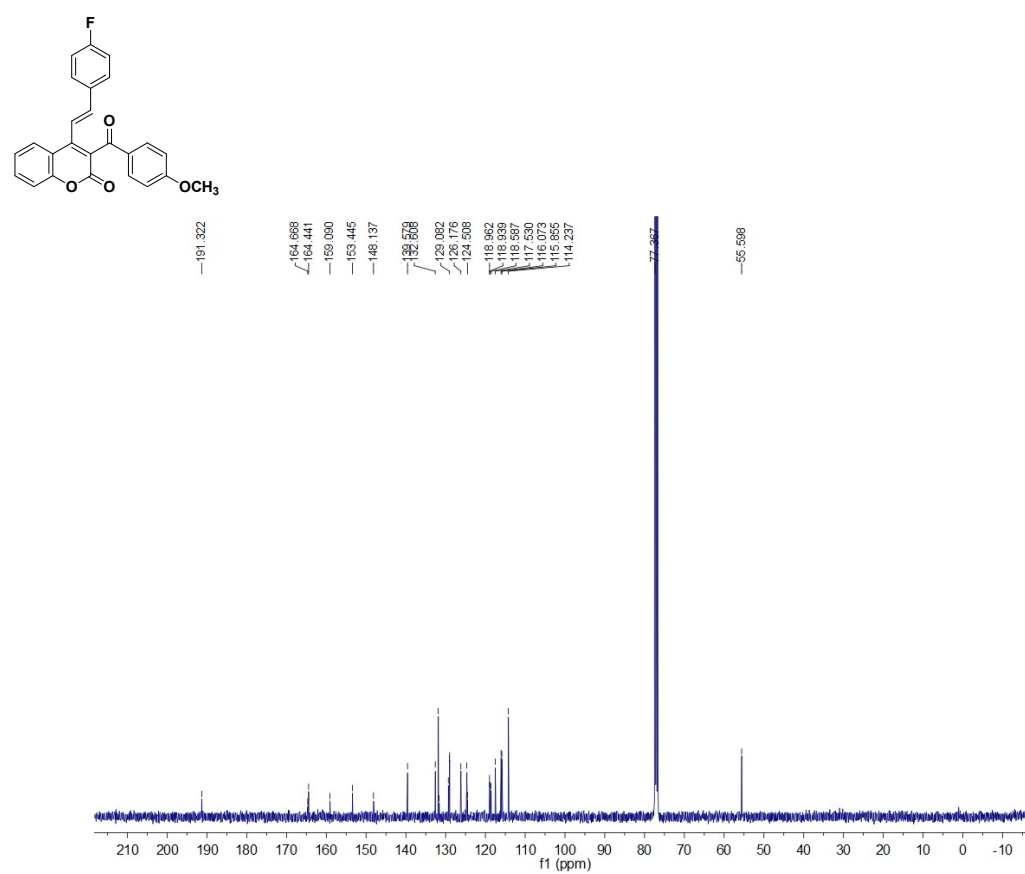

## <sup>1</sup>H NMR Spectra of Compound 3ed



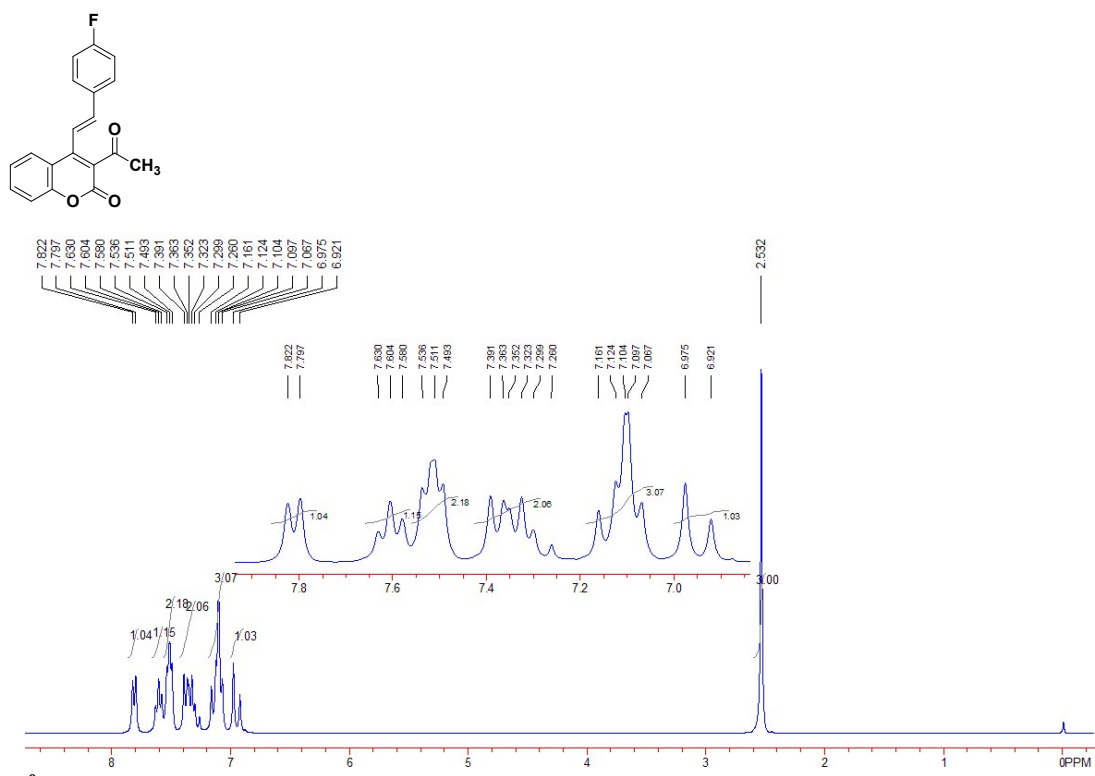

### <sup>13</sup>C NMR Spectra of Compound 3ed

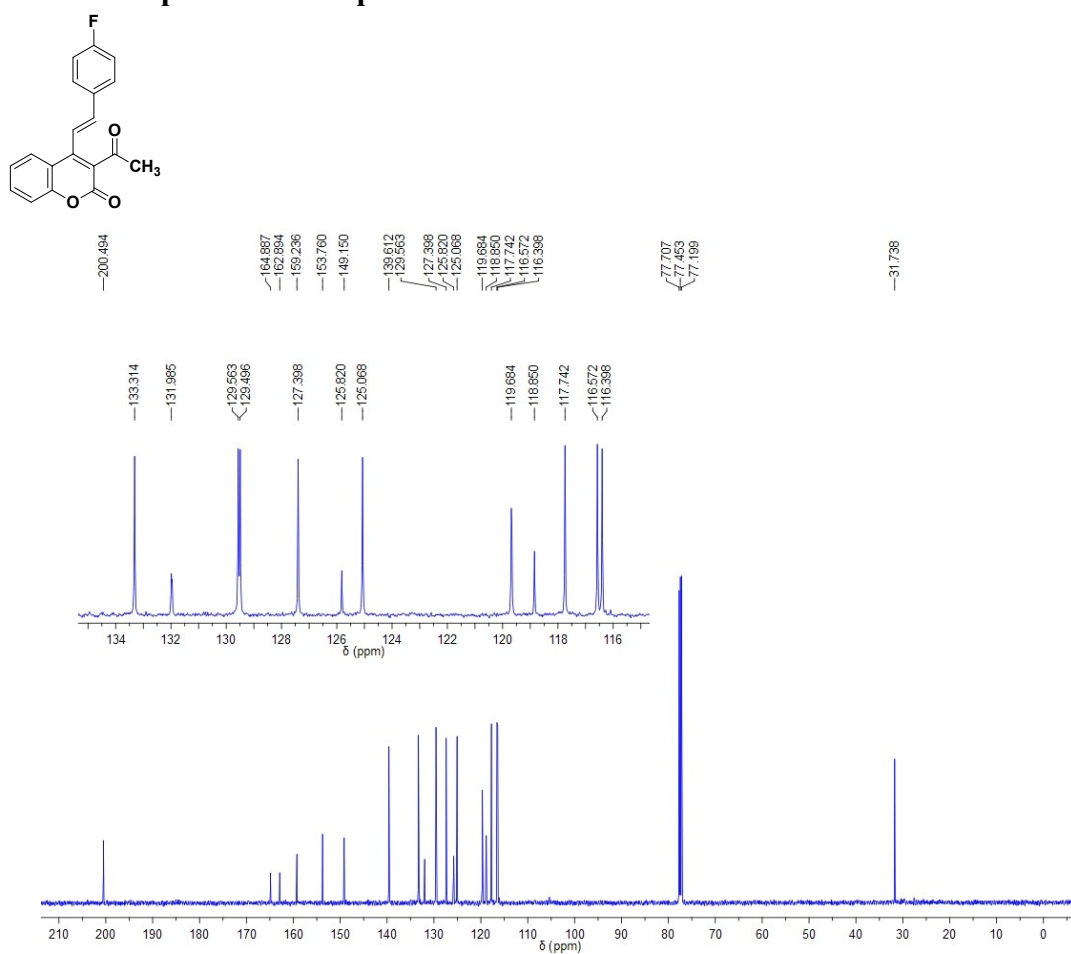

### <sup>1</sup>H NMR Spectra of Compound 3fa



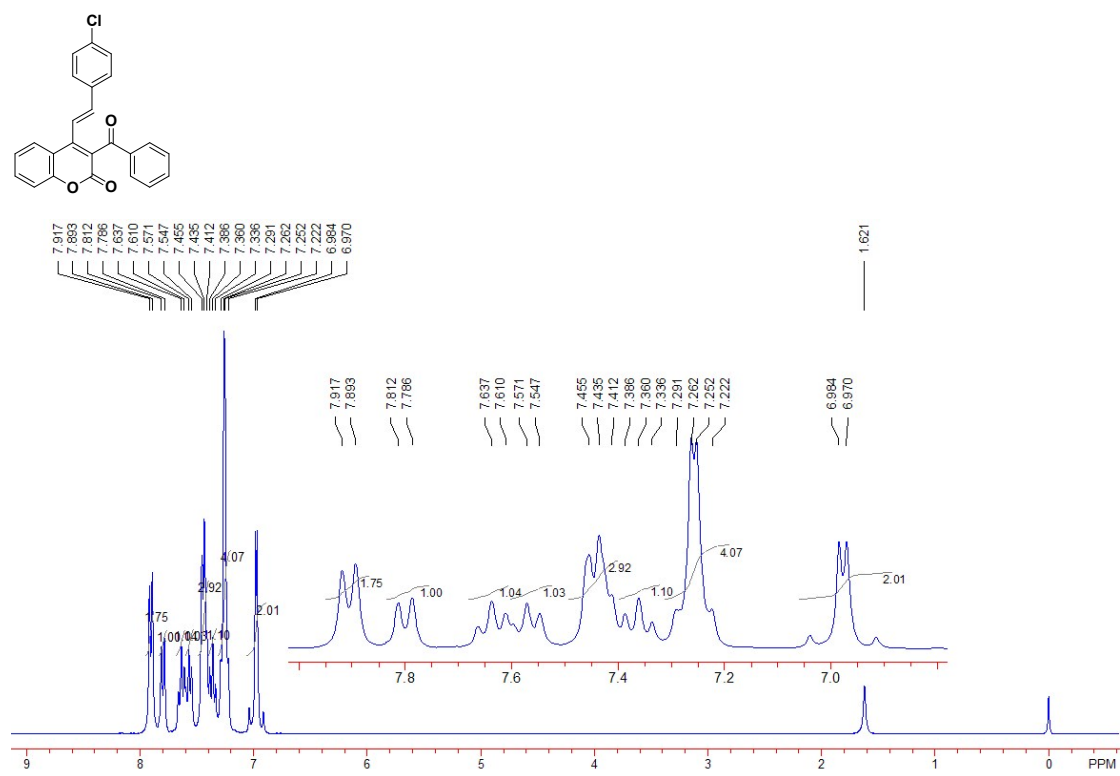

### <sup>13</sup>C NMR Spectra of Compound 3fa

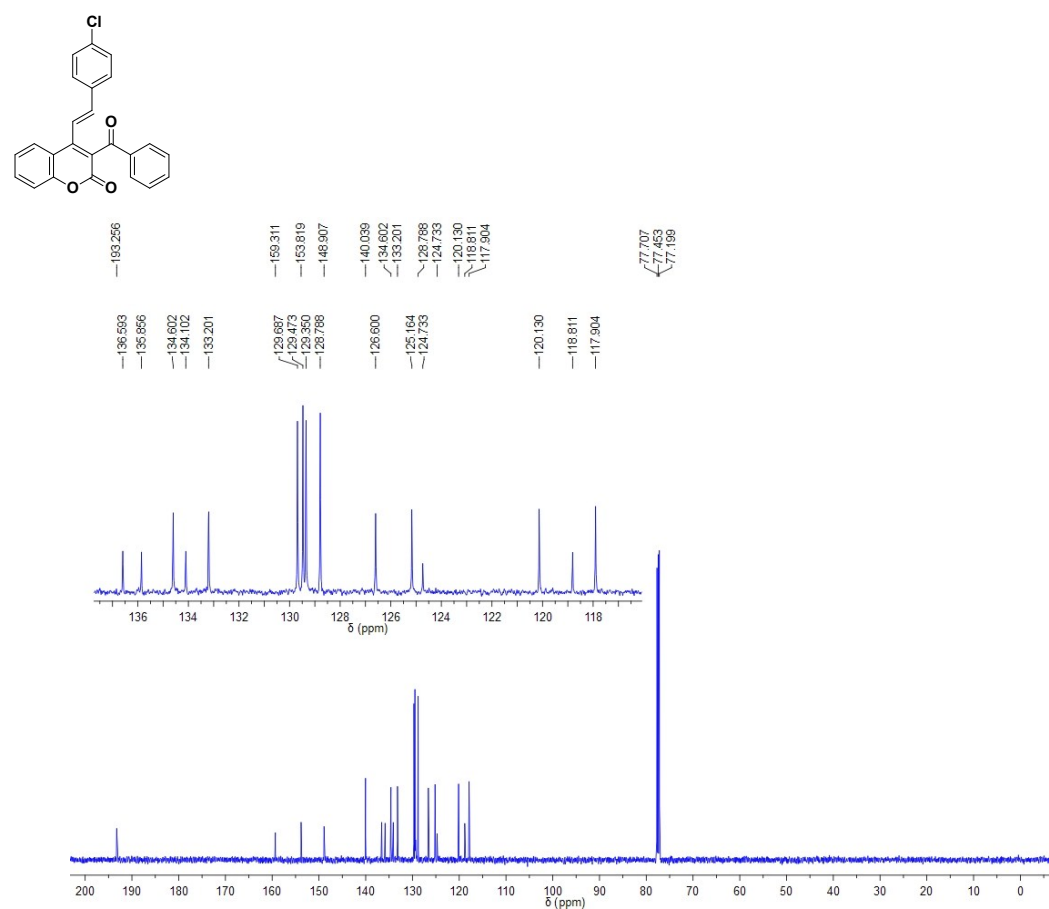

### <sup>1</sup>H NMR Spectra of Compound 3fb



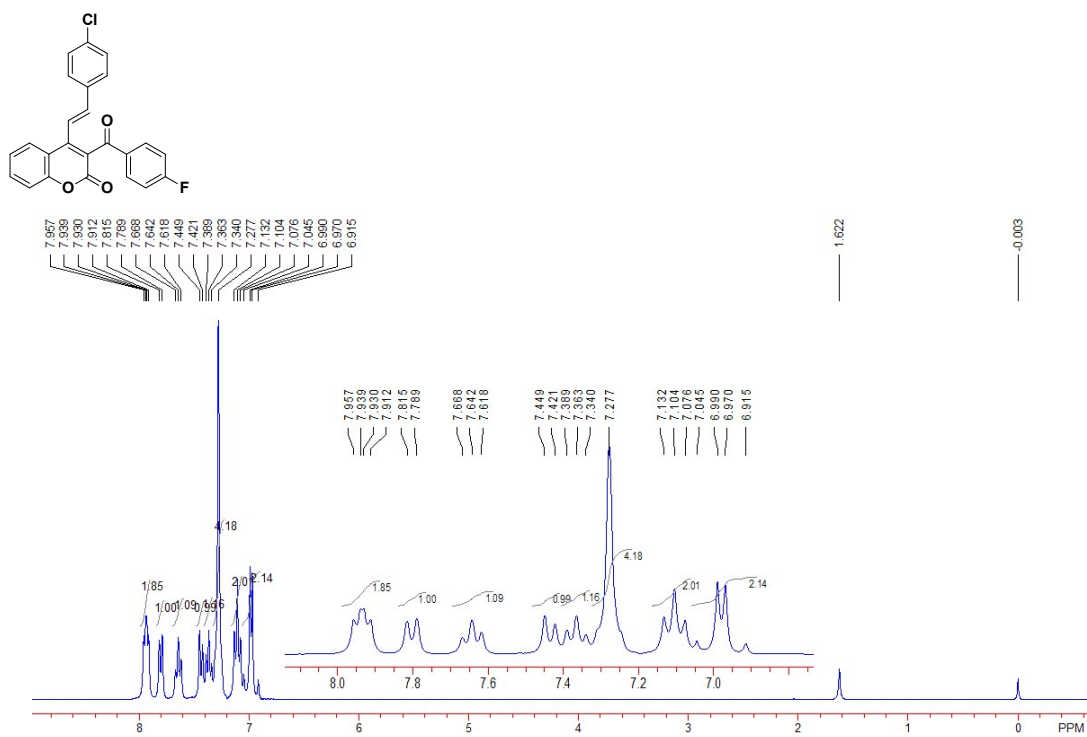

### <sup>13</sup>C NMR Spectra of Compound 3fb

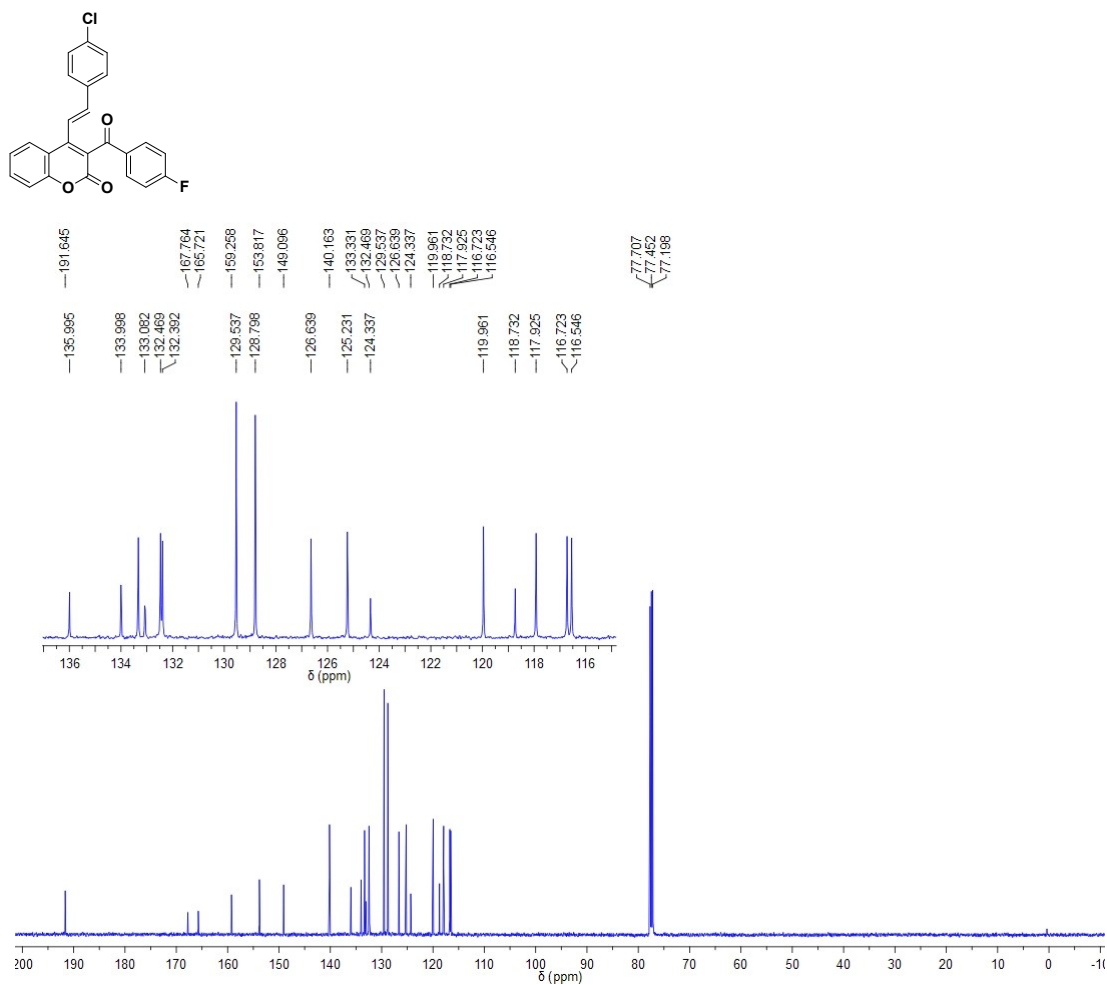



## <sup>1</sup>H NMR Spectra of Compound 3fc

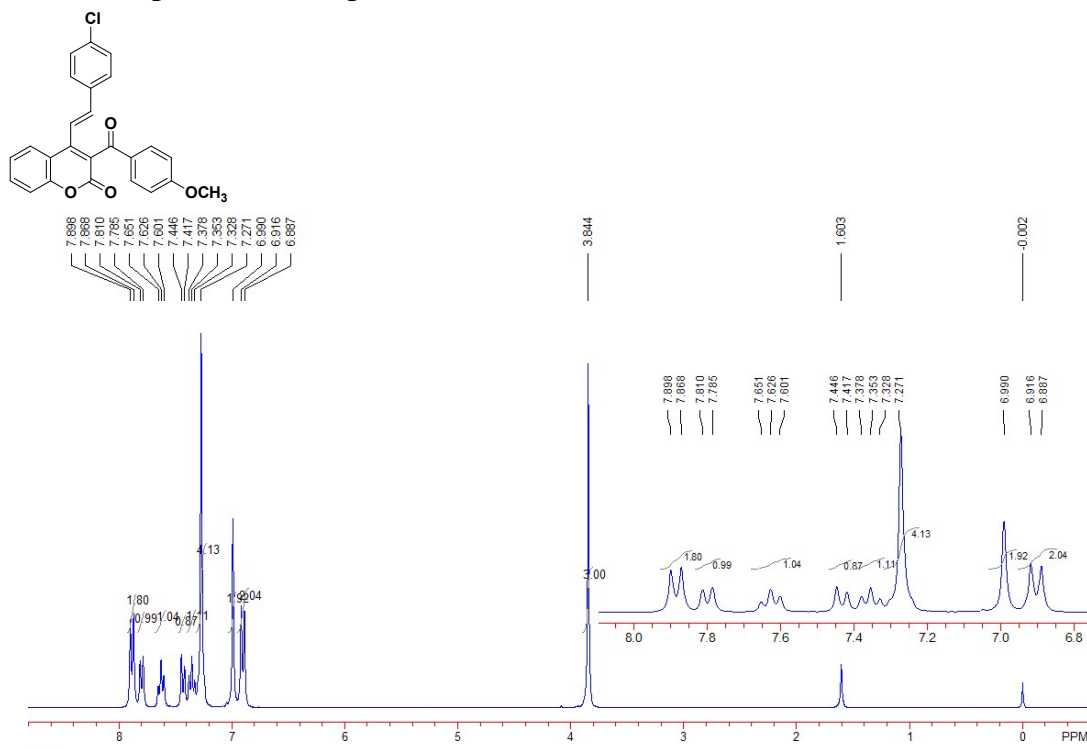

## <sup>13</sup>C NMR Spectra of Compound 3fc

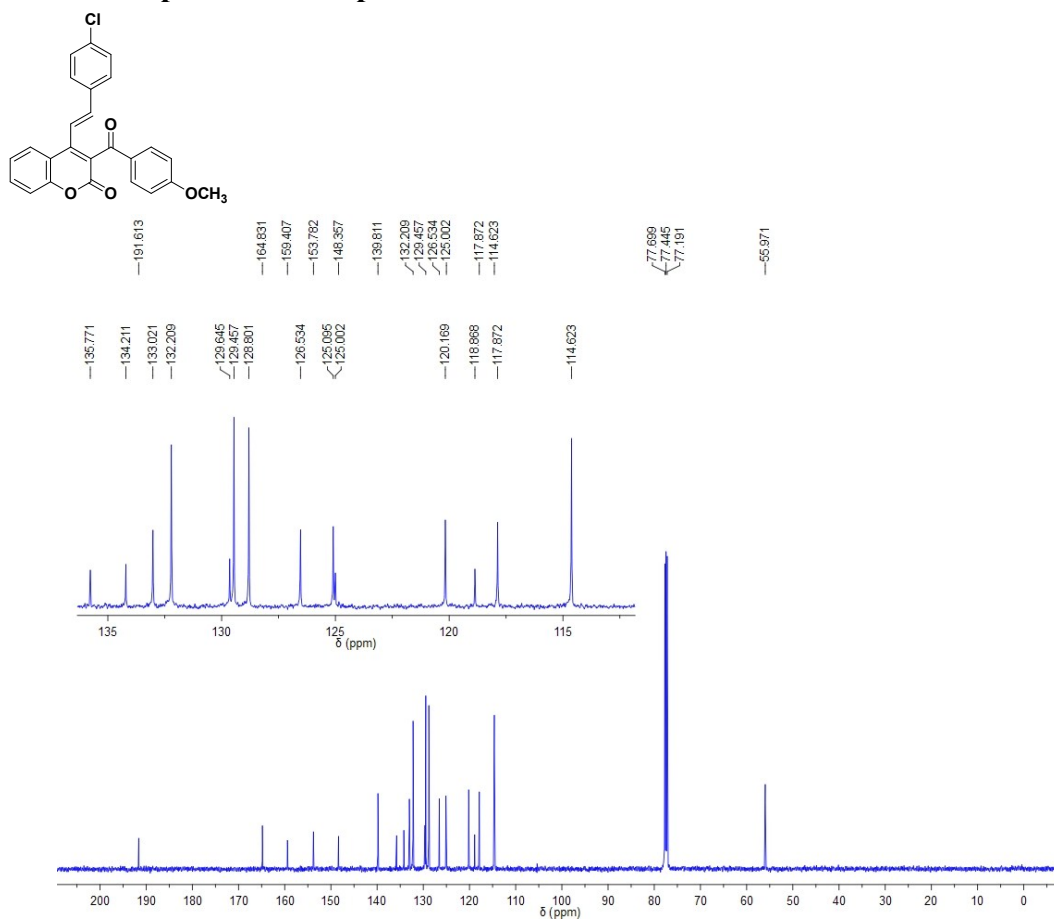



## <sup>1</sup>H NMR Spectra of Compound 3fd

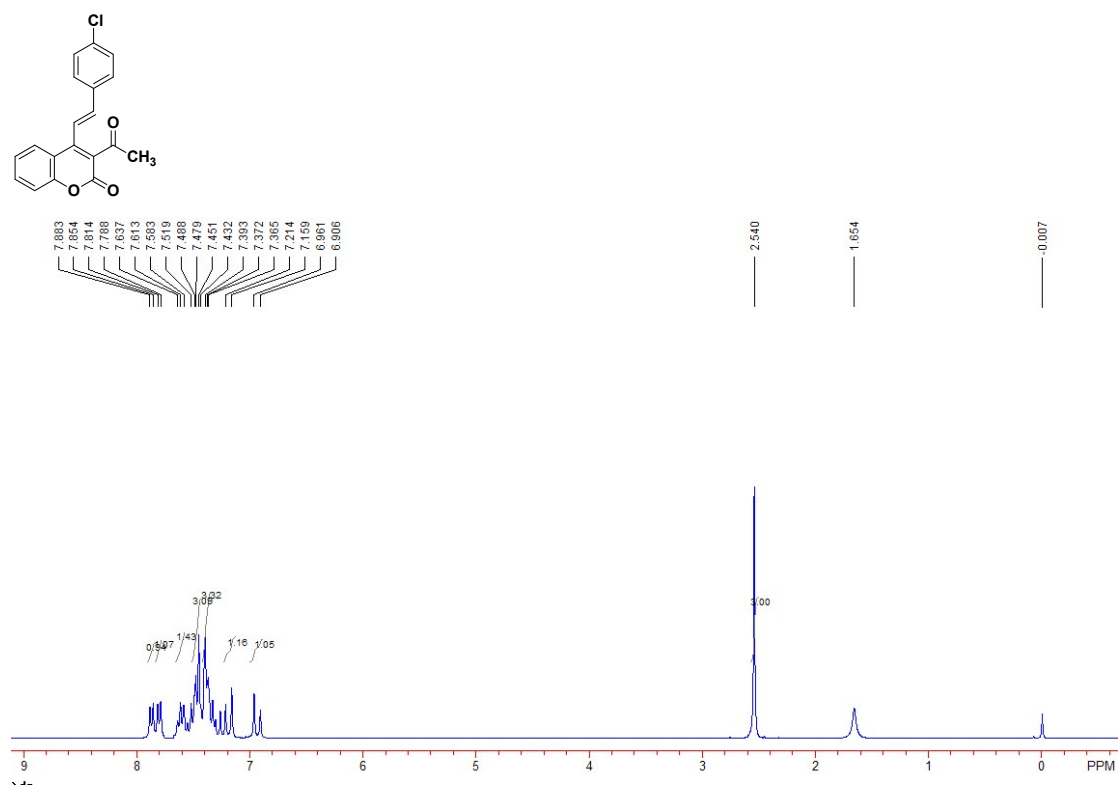

## <sup>13</sup>C NMR Spectra of Compound 3fd

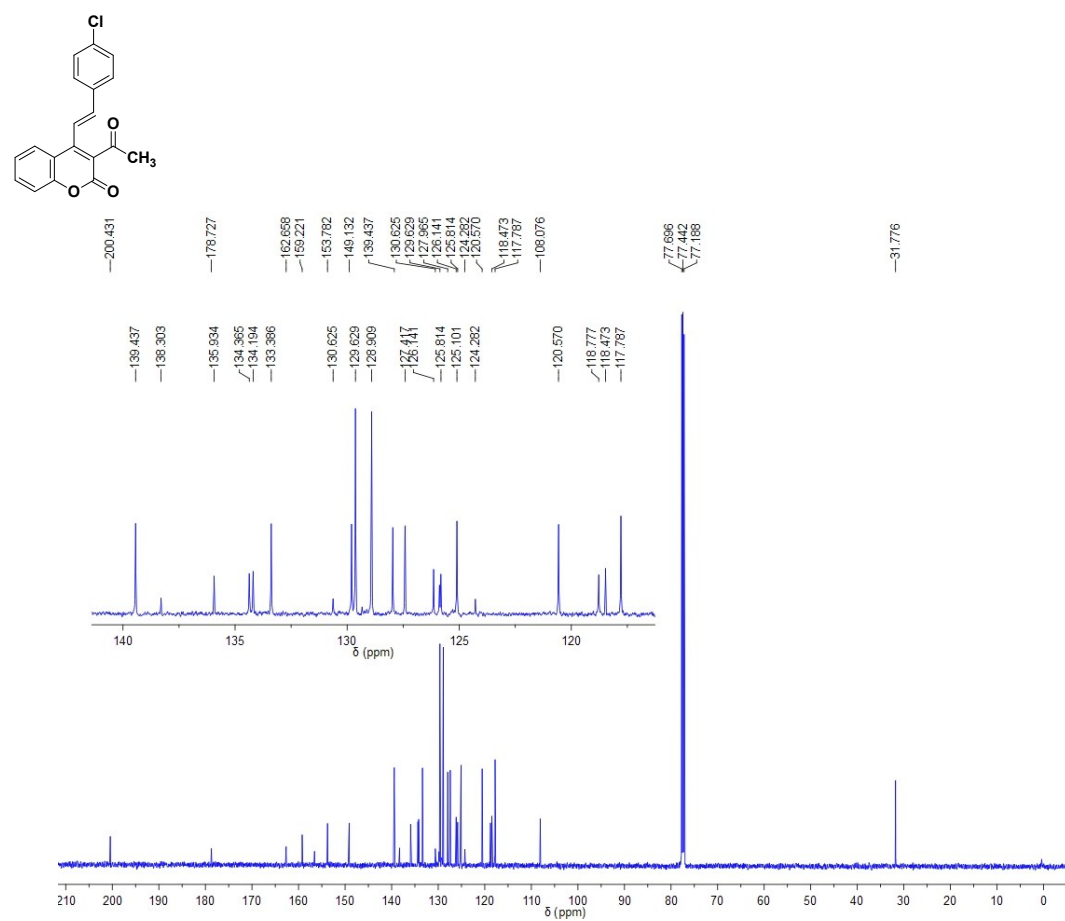



## <sup>1</sup>H NMR Spectra of Compound 3ga

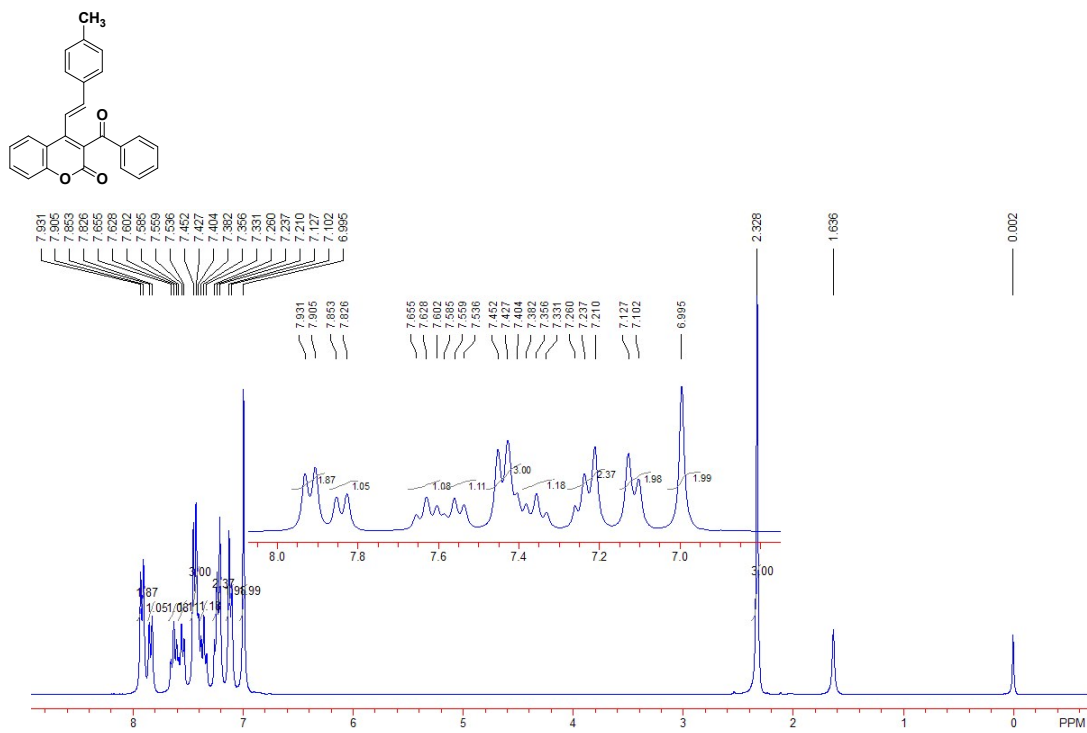

## <sup>13</sup>C NMR Spectra of Compound 3ga

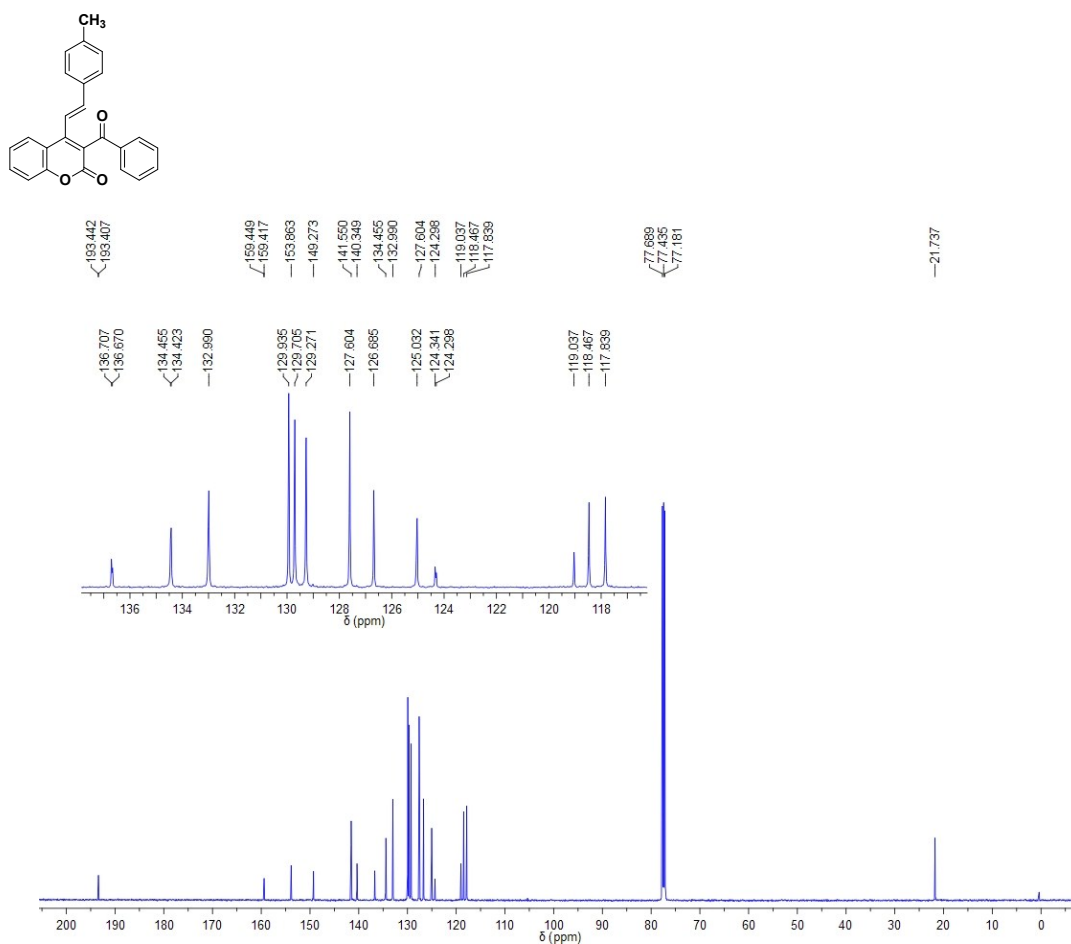



## <sup>1</sup>H NMR Spectra of Compound 3gb

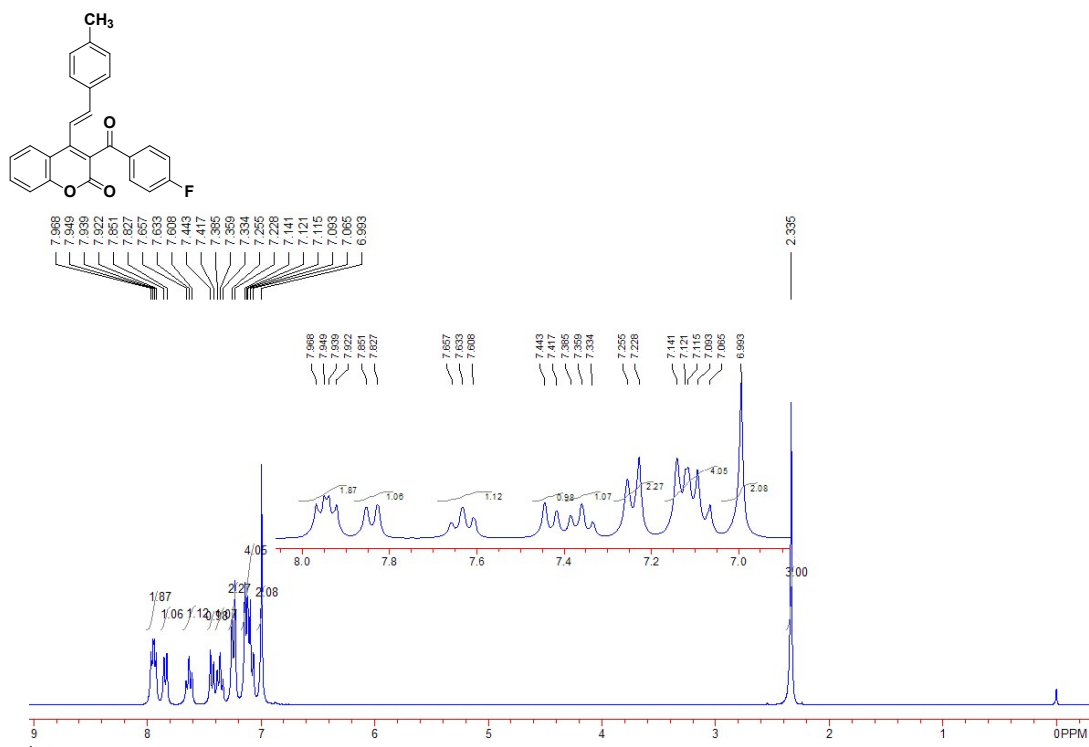

## <sup>13</sup>C NMR Spectra of Compound 3gb

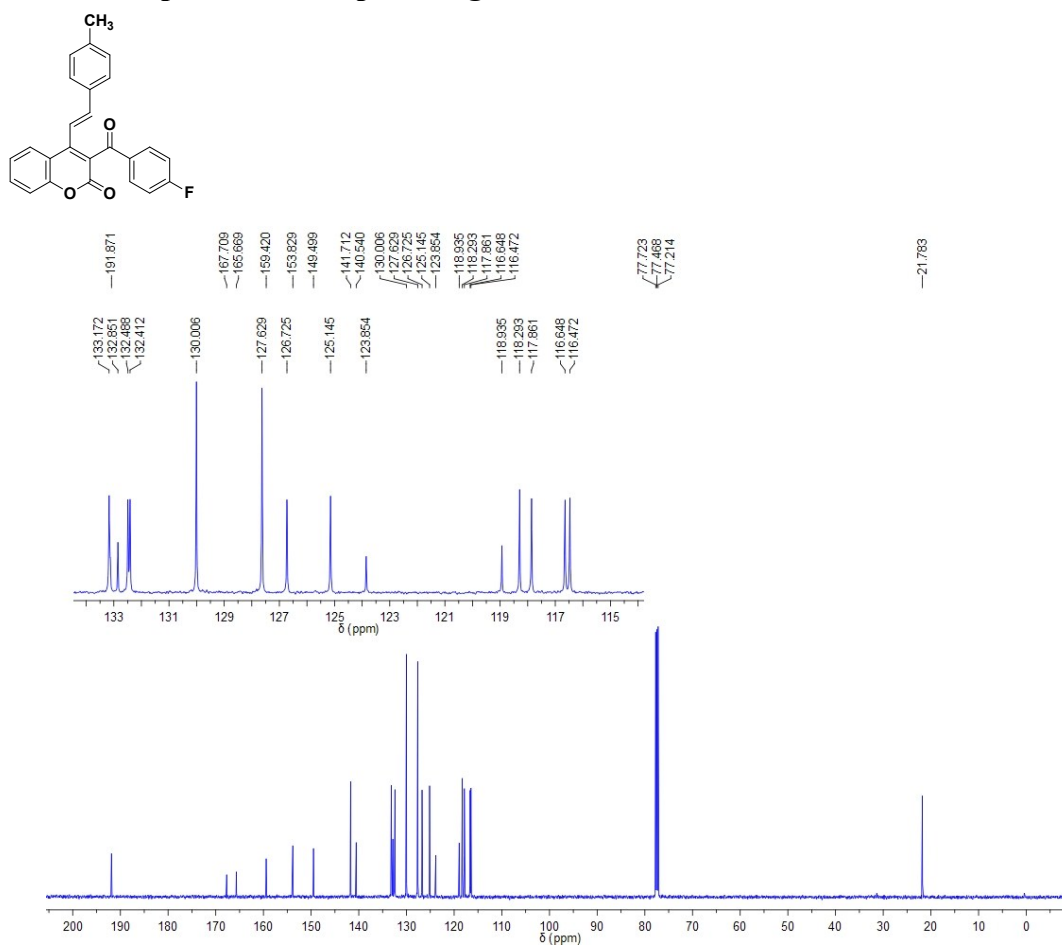



# **<sup>1</sup>H NMR Spectra of Compound 3gc**

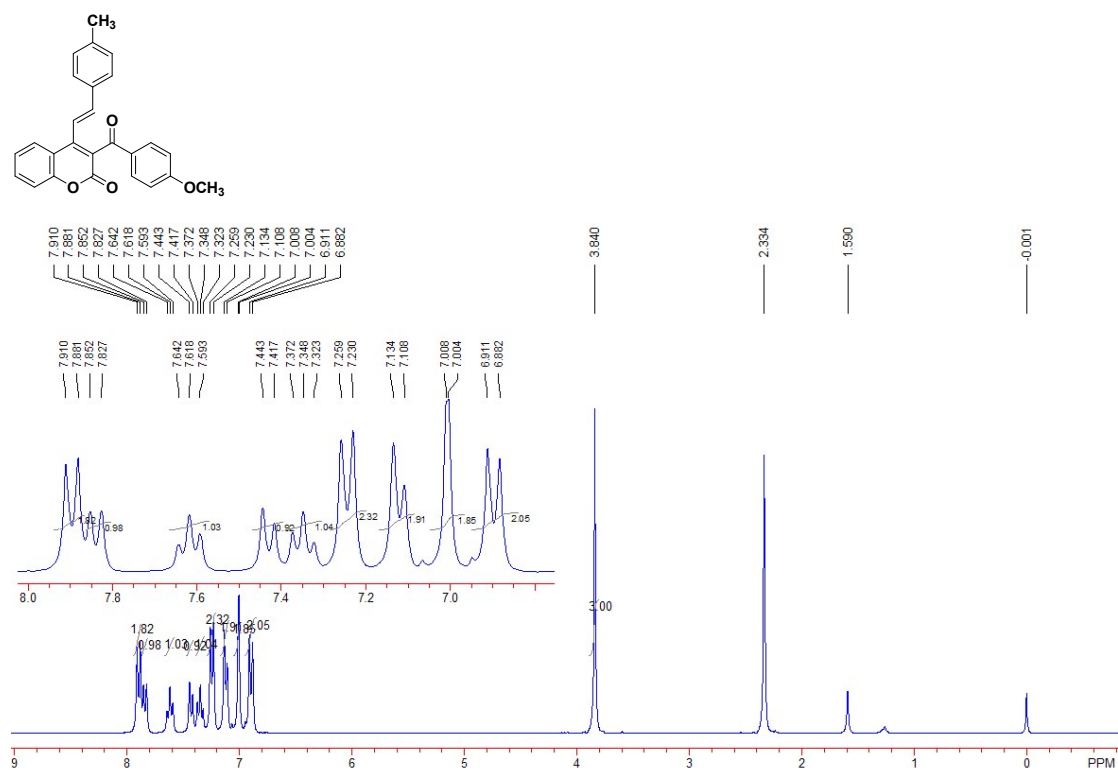

# **<sup>13</sup>C NMR Spectra of Compound 3gc**

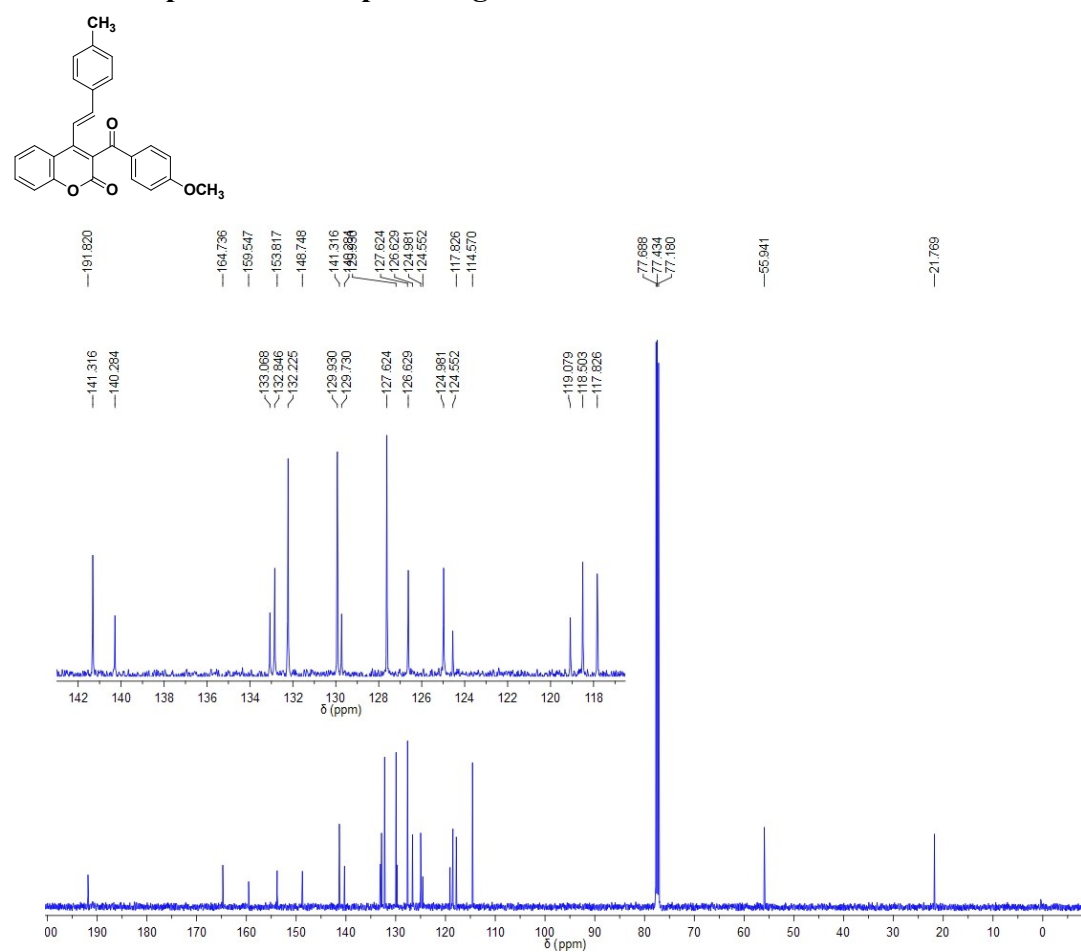



# <sup>1</sup>H NMR and <sup>13</sup>C NMR Spectra of Compound 3gd

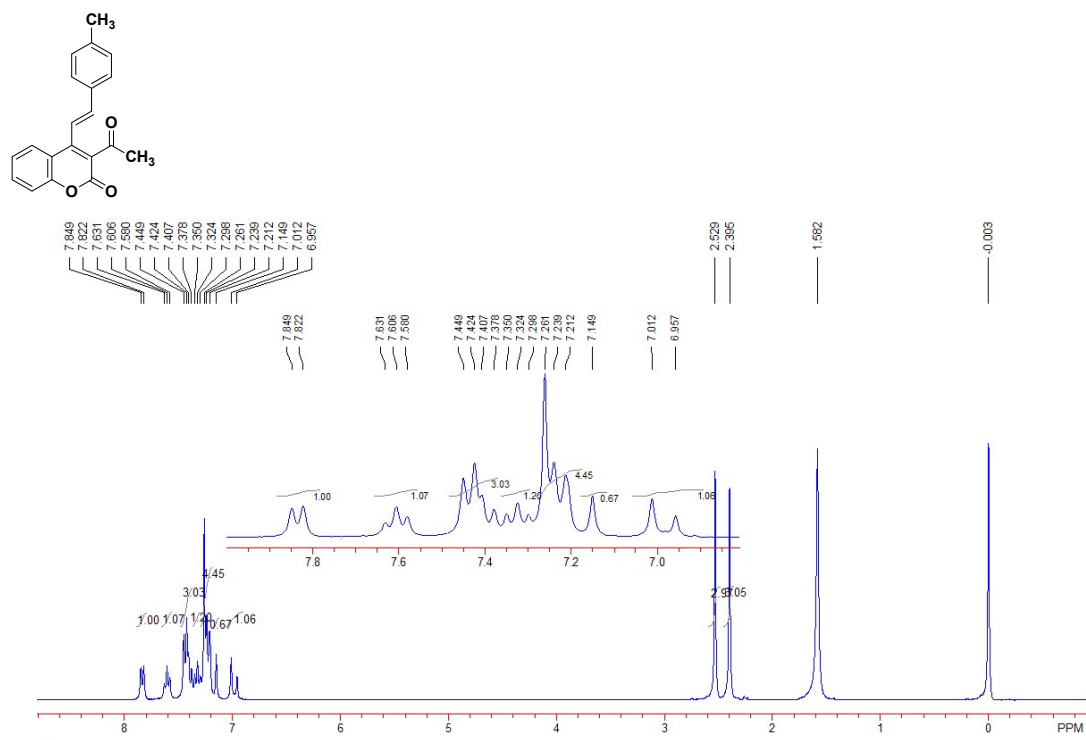

## <sup>13</sup>C NMR Spectra of Compound 3gd

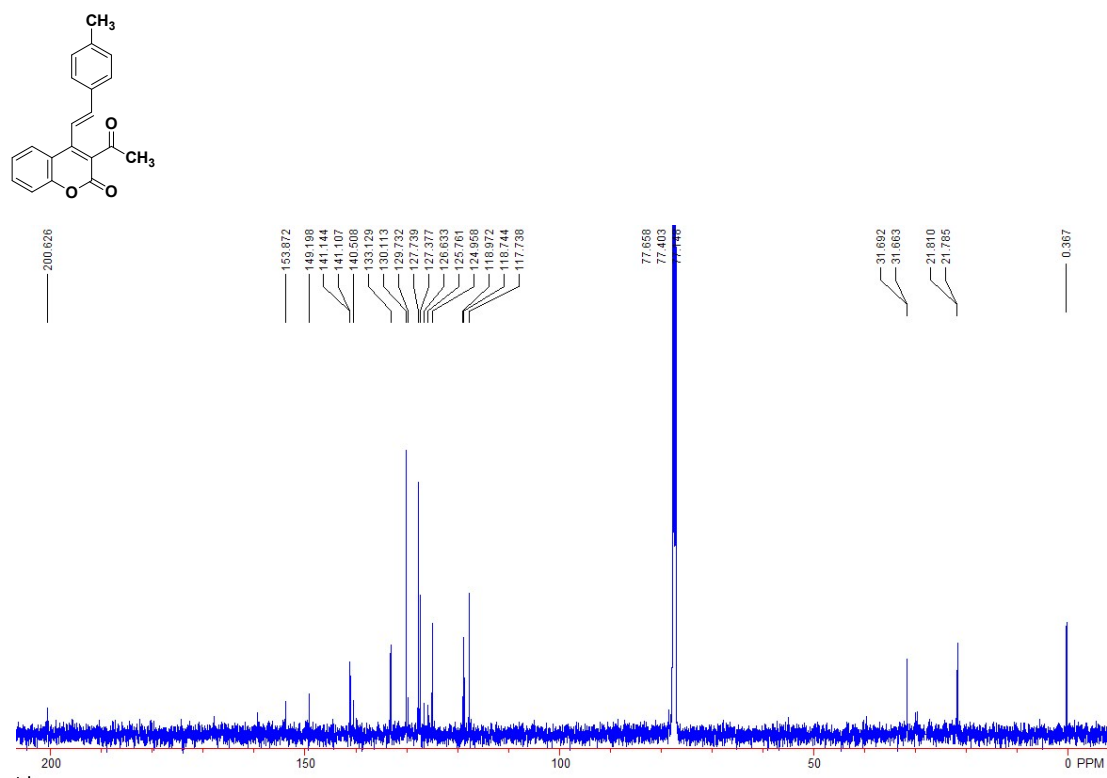



## <sup>1</sup>H NMR Spectra of Compound 3ha

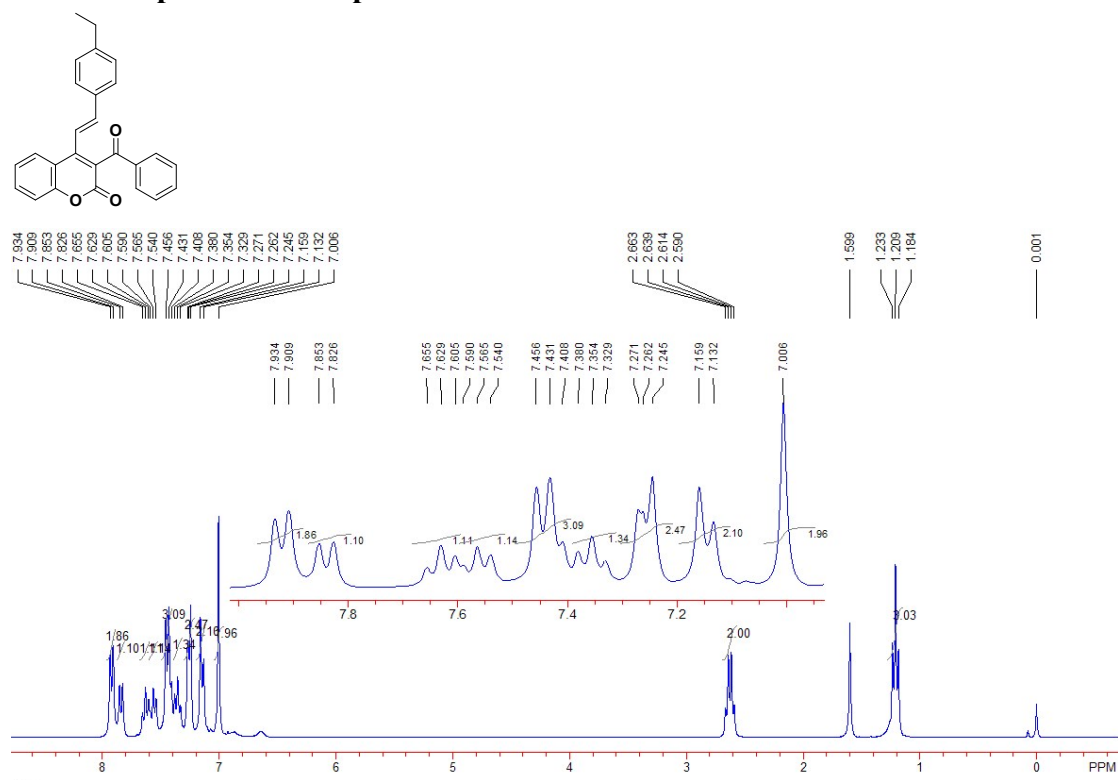

## <sup>13</sup>C NMR Spectra of Compound 3ha

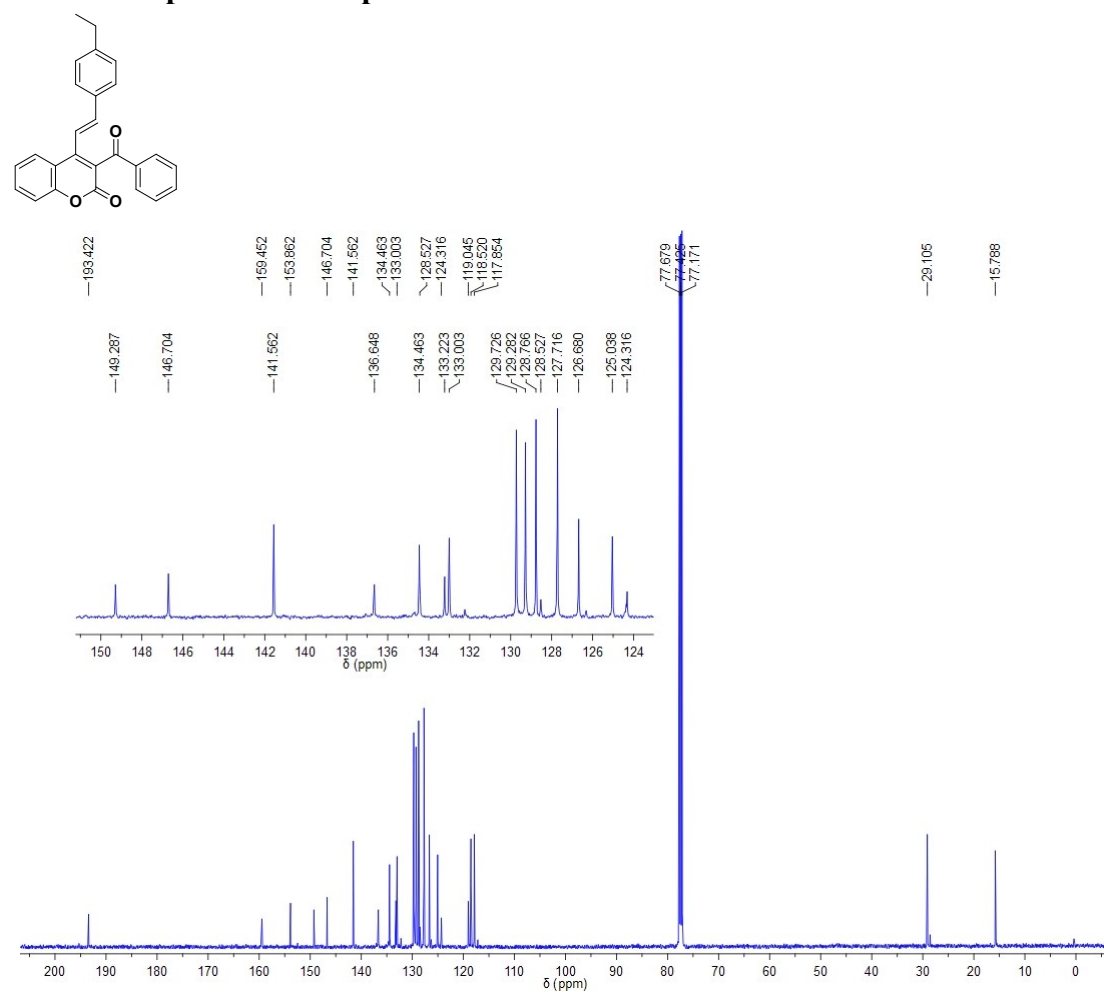



## <sup>1</sup>H NMR Spectra of Compound 3hc

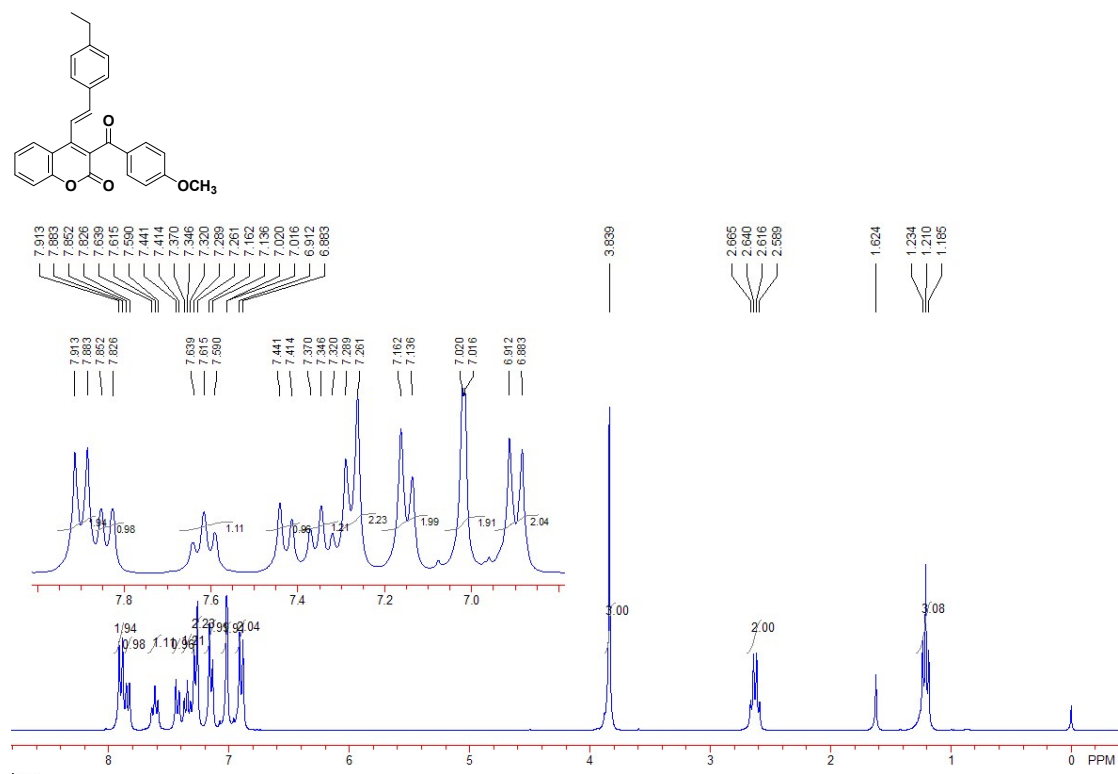

## <sup>13</sup>C NMR Spectra of Compound 3hc

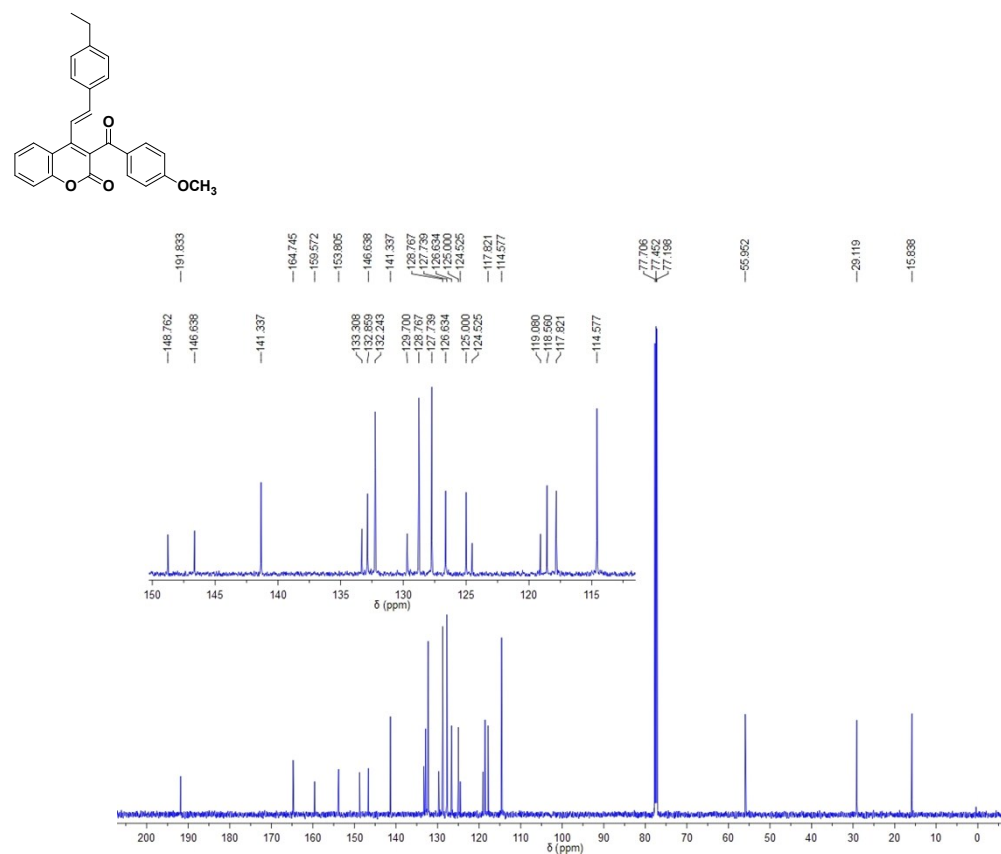



# <sup>1</sup>H NMR Spectra of Compound 3ia

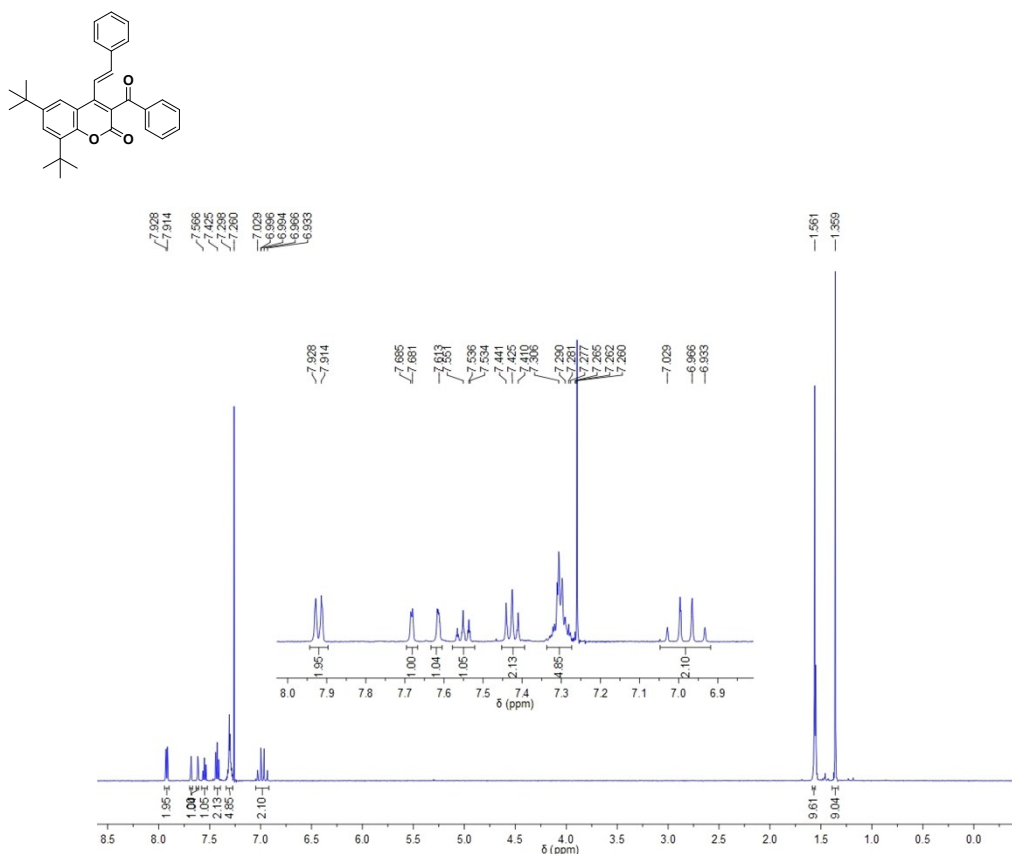

# <sup>13</sup>C NMR Spectra of Compound 3ia

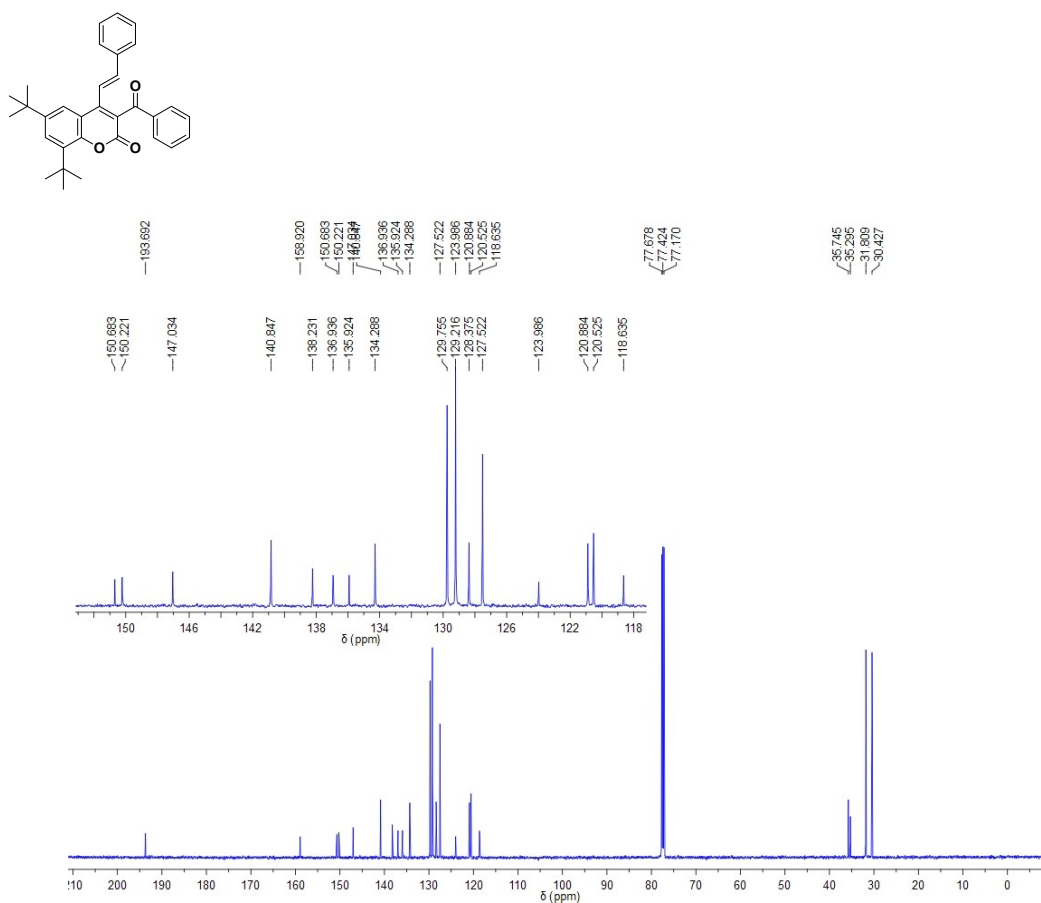



## <sup>1</sup>H NMR Spectra of Compound 3ae

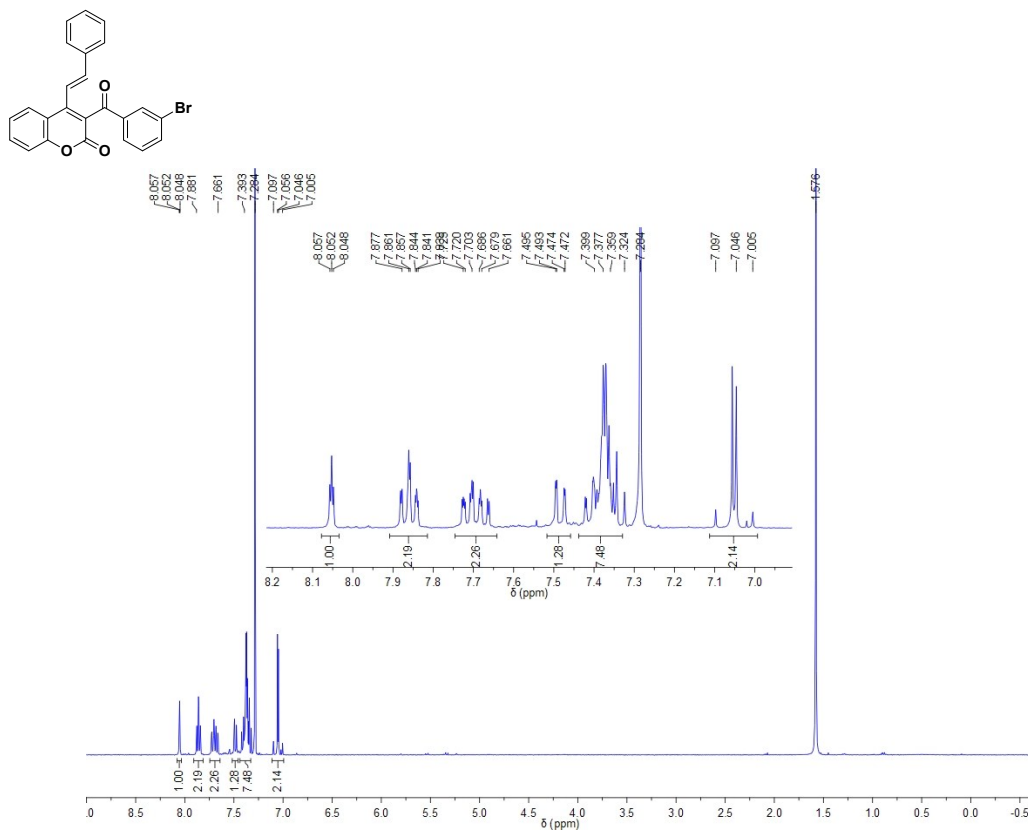

## <sup>13</sup>C NMR Spectra of Compound 3ae

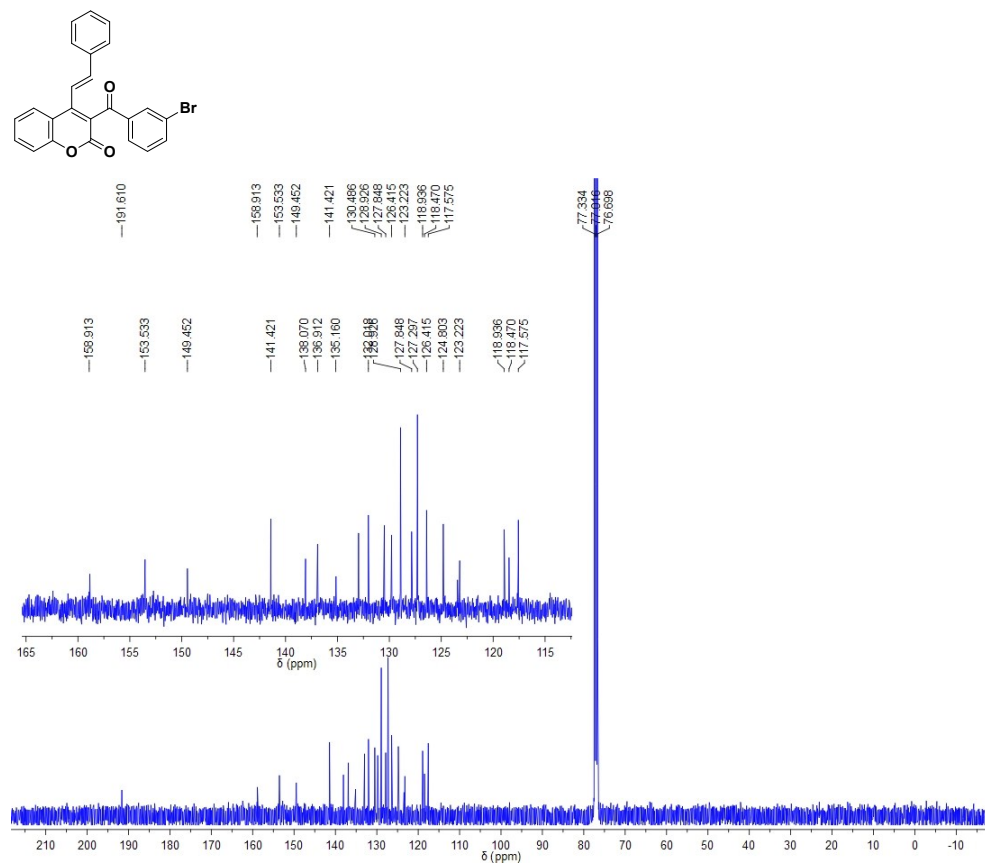

Supplement: c9ob00323a1.pdf [file c9ob00323a1.pdf]
